# Supplementary material
Source: Research Square preprint supplement (doi:10.21203/rs.3.rs-7342879/v1)
Supplement: Supplementary file 1 [file af62339ad332b81a1031d156.docx]

Table. Incidence of diabetes in subarachnoid hemorrhage for adults aged 55 and older between 1990 and 2021 at the global and regional level

|  | **1990** |  | **2021** |  | **1990-2021** |
| --- | --- | --- | --- | --- | --- |
|  | Incident cases No. *102 (95% UI) | ASIR per 100,000No. (95% UI) | Incident cases No. *102 (95% UI) | ASIR per 100,000No.(95% UI) | EAPC of ASIR No. (95% CI) |
| Overall | 2282.99 [1618.61-3169.21] | 35.14 [24.98-48.59] | 3526.09 [2601.46-4708.66] | 23.73 [17.5-31.69] | -1.75 [-1.92 to -1.58] |
| Sex |  |  |  |  |  |
| Female | 1252.34 [876.38-1737.42] | 34.91 [24.42-48.4] | 1897.86 [1374.66-2552.26] | 23.45 [16.92-31.63] | -1.63 [-1.76 to -1.51] |
| Male | 1030.64 [717.67-1450.5] | 35.76 [25.04-49.96] | 1628.22 [1173.14-2202.75] | 24.17 [17.48-32.58] | -1.89 [-2.12 to -1.67] |
| Socio-demographic index |  |  |  |  |  |
| High SDI | 547.35 [393.9-746.39] | 28.88 [20.7-39.51] | 838.87 [626.97-1108.48] | 22.42 [16.57-29.95] | -1 [-1.08 to -0.93] |
| High-middle SDI | 576.21 [411.84-793.25] | 34.93 [25.05-47.85] | 749.53 [556.63-989.06] | 21.4 [15.87-28.27] | -2.11 [-2.3 to -1.92] |
| Middle SDI | 776.57 [540.42-1093.78] | 49.77 [34.88-69.63] | 1233.34 [899.16-1653.72] | 27.62 [20.24-36.88] | -2.68 [-2.99 to -2.37] |
| Low-middle SDI | 291.41 [202.77-409.32] | 30.85 [21.59-43.09] | 544.06 [393.85-736.04] | 23.55 [17.11-31.73] | -1.11 [-1.2 to -1.03] |
| Low SDI | 89.5 [60.52-129.67] | 25.43 [17.3-36.59] | 157.28 [109.58-220.57] | 20.18 [14.14-28.14] | -0.97 [-1.05 to -0.89] |
| Region |  |  |  |  |  |
| Andean Latin America | 13.05 [9.51-17.46] | 39.34 [28.72-52.58] | 30.42 [22.9-39.26] | 30.61 [23.02-39.49] | -0.85 [-0.94 to -0.75] |
| Australasia | 8.71 [6.7-11.11] | 21.75 [16.65-27.85] | 16.36 [12.27-21.52] | 16.95 [12.5-22.62] | -0.85 [-0.94 to -0.77] |
| Caribbean | 11.57 [8.44-15.47] | 27 [19.67-36.08] | 22.67 [16.93-29.58] | 24.23 [18.07-31.66] | -0.44 [-0.48 to -0.4] |
| Central Asia | 19.75 [14.82-26] | 25.73 [19.36-33.74] | 33.85 [26.52-42.74] | 26.02 [20.69-32.47] | 0.21 [0.15 to 0.27] |
| Central Europe | 61.58 [47.3-79.68] | 24.07 [18.53-31.03] | 81.93 [66.13-100.67] | 20 [15.98-24.8] | -0.82 [-0.9 to -0.74] |
| Central Latin America | 39.76 [29.08-53.85] | 30.01 [21.98-40.56] | 130.29 [97.41-169.67] | 30.57 [22.88-39.77] | 0.05 [0.01 to 0.1] |
| Central Sub-Saharan Africa | 8.07 [5.37-11.67] | 22.6 [15.17-32.43] | 17.99 [12.17-25.92] | 20.81 [14.21-29.72] | -0.32 [-0.37 to -0.27] |
| East Asia | 836.55 [575.62-1181.34] | 66.48 [46.23-93.06] | 986.66 [706.5-1340.46] | 26.39 [18.97-35.7] | -4.01 [-4.44 to -3.59] |
| Eastern Europe | 123.16 [85.04-173.8] | 25.85 [17.86-36.38] | 160.91 [117.11-216.6] | 25.14 [18.22-33.94] | -0.31 [-0.64 to 0.02] |
| Eastern Sub-Saharan Africa | 30.09 [20.06-44.04] | 25.62 [17.14-37.31] | 53.84 [36.47-77.29] | 20.75 [14.15-29.63] | -0.86 [-0.93 to -0.79] |
| High-income Asia Pacific | 198.16 [138.58-275.09] | 57.12 [39.93-79.24] | 313.65 [232.49-412.59] | 42.4 [31.13-56.29] | -1.06 [-1.14 to -0.97] |
| High-income North America | 113.51 [78.2-159.98] | 18.98 [13-26.89] | 219.35 [157.65-298.07] | 18.26 [13.03-24.97] | -0.3 [-0.46 to -0.13] |
| North Africa and Middle East | 61.42 [43.56-84.53] | 23.77 [16.99-32.5] | 111.4 [81.86-147.28] | 15.88 [11.8-20.82] | -1.58 [-1.67 to -1.48] |
| Oceania | 1.72 [1.24-2.33] | 43.33 [31.64-57.96] | 3.69 [2.72-4.84] | 34.86 [26.13-45.18] | -0.87 [-0.92 to -0.81] |
| South Asia | 276.71 [189.41-394.69] | 31.39 [21.62-44.5] | 516.07 [365.16-709.7] | 21.66 [15.37-29.68] | -1.52 [-1.64 to -1.4] |
| Southeast Asia | 158.36 [112.74-216.79] | 40.8 [29.26-55.42] | 329.83 [241.71-439.59] | 31.14 [23.04-41.17] | -1.07 [-1.16 to -0.98] |
| Southern Latin America | 31.67 [23.97-41.02] | 40.23 [30.47-52.09] | 41.48 [32.23-52.31] | 27.58 [21.33-34.88] | -1.37 [-1.47 to -1.27] |
| Southern Sub-Saharan Africa | 6.98 [4.69-10.12] | 16.17 [10.9-23.35] | 13.89 [9.55-19.62] | 14.94 [10.35-20.95] | -0.34 [-0.5 to -0.19] |
| Tropical Latin America | 43.95 [29.73-63.18] | 29.39 [19.95-42.11] | 114.87 [81.23-158.92] | 25.92 [18.34-35.83] | -0.63 [-0.71 to -0.56] |
| Western Europe | 217.51 [161.28-288.68] | 21.85 [16.09-29.17] | 290.32 [223.16-373.34] | 17.29 [12.97-22.66] | -0.8 [-0.85 to -0.76] |
| Western Sub-Saharan Africa | 20.68 [13.58-30.47] | 14.88 [9.81-21.81] | 36.59 [24.36-53.33] | 11.88 [7.99-17.17] | -0.93 [-1.02 to -0.84] |
