# Supplementary material
Source: Research Square preprint supplement (doi:10.21203/rs.3.rs-7342879/v1)
Supplement: Supplementary file 2 [file cc6d32cac5a3f29a0e71c411.docx]

**Supplementary Online Content**

eFigure 1. Incidence, Deaths, and DALYs Rates of SAH aged 55 and older in 204 Countries by SDI in 2021

eFigure 2. Proportion of SAH aged 55 and older Deaths Attributable to Risk Factors

eFigure 3. Projections of SAH deaths and DALY rate in global aged 55 and older from 1990 to 2050

eTable 1. Incidence of SAH aged 55 and older between 1990 and 2021 at the National Level

eTable 2. Deaths of SAH aged 55 and older between 1990 and 2021 at the global, regional levels the and national level

eTable 3. DALYs of SAH aged 55 and older between 1990 and 2021 at the global, regional levels the and national level

**eFigure 1. Incidence, Deaths, and DALYs Rates of of SAH aged 55 and older in 204 Countries by SDI in 2021**

**(A) Incidence rate. (B) Deaths rate.**

**
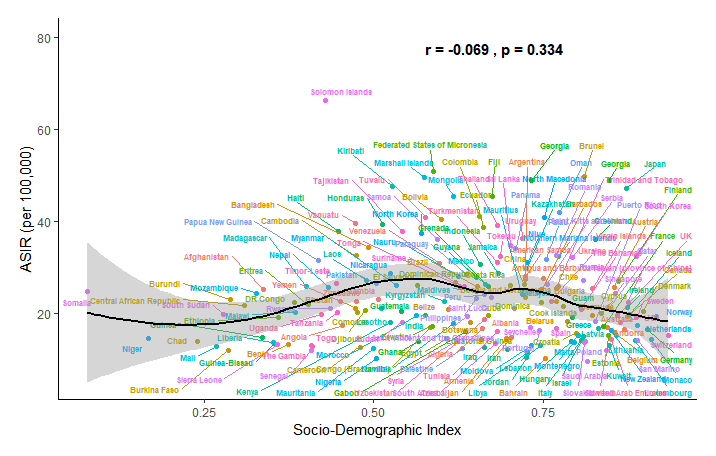

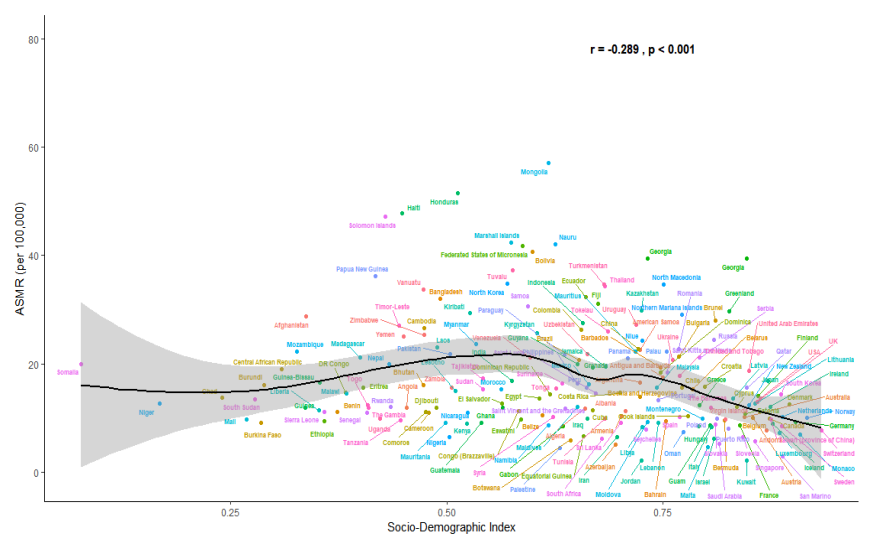
**

**(C) DALYs rate.**

**
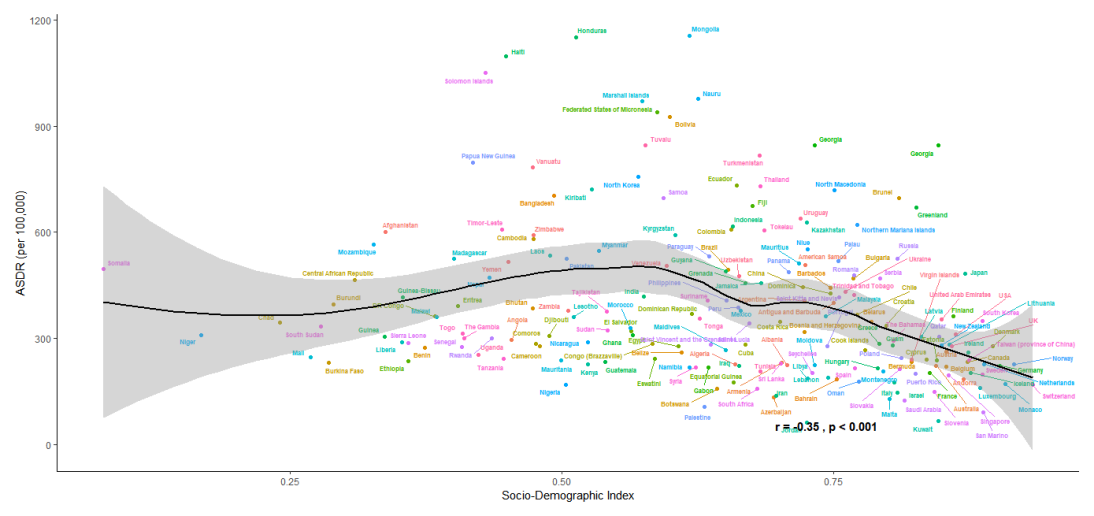
**

**eFigure 2. Proportion of SAH aged 55 and older deaths attributable to risk factors.**

**
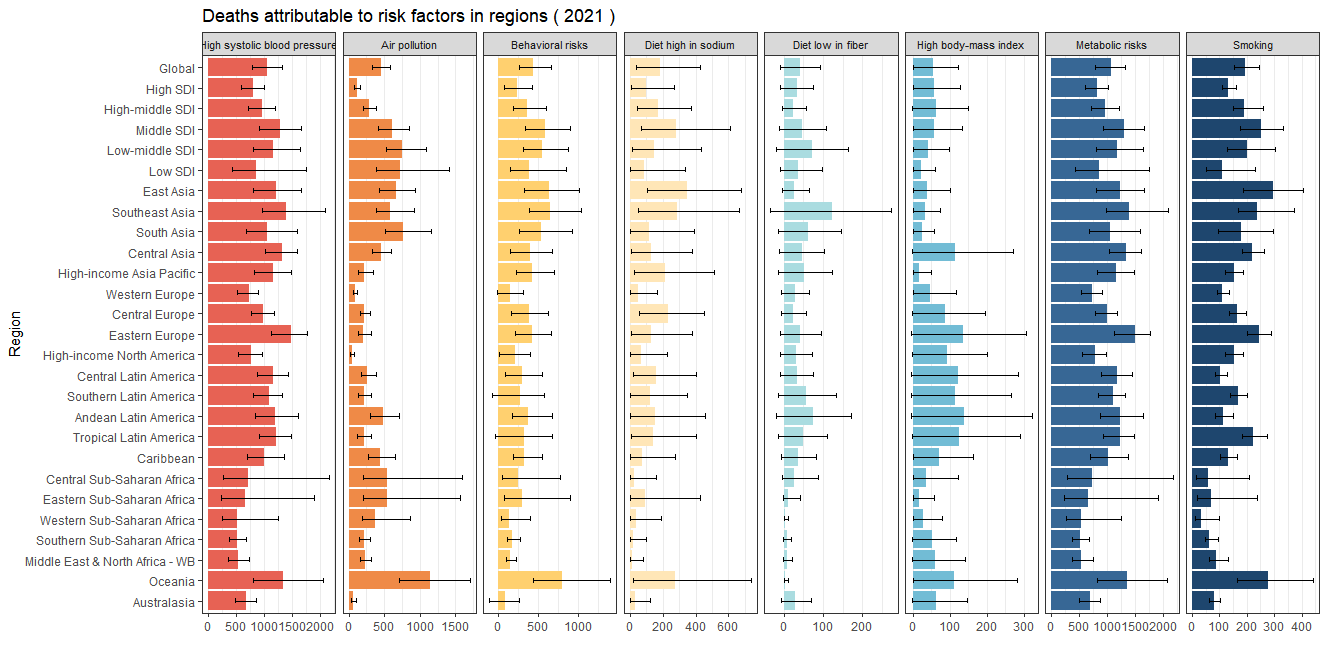
**

**eFigure 3. Projections of SAH deaths and DALY rate in global aged 55 and older from 1990 to 2050**

**
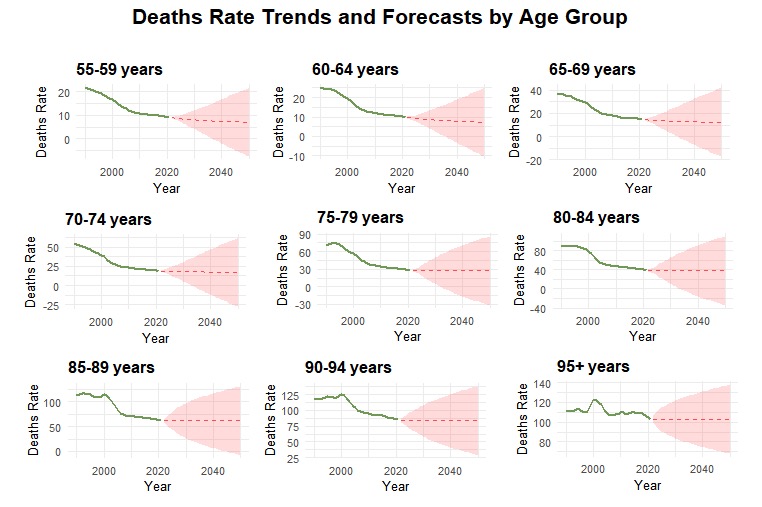

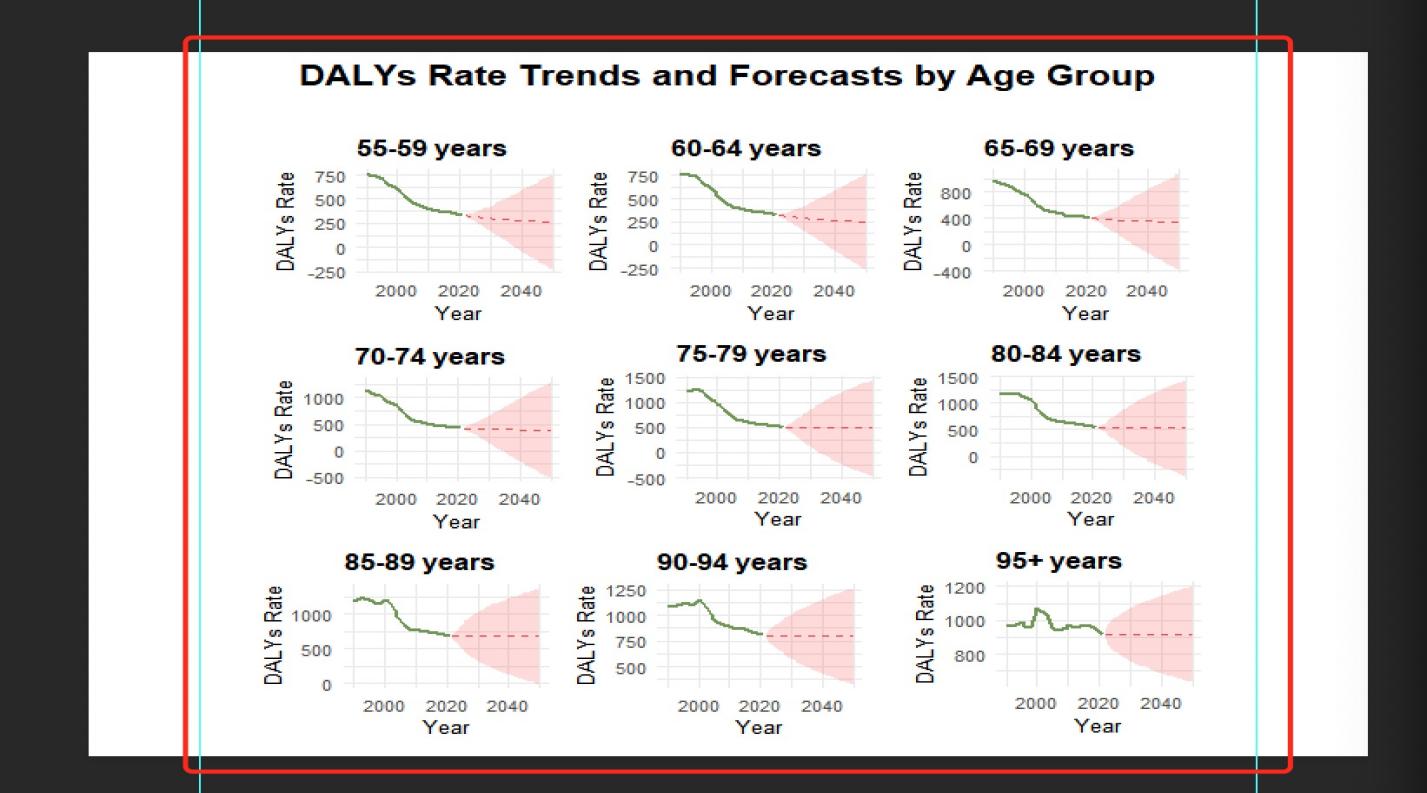
**

**eTable 1. Incidence of SAH aged 55 and older between 1990 and 2021 at the National Level**

|  | **1990** |  | **2021** |  | **1990-2021** |
| --- | --- | --- | --- | --- | --- |
|  | Incident cases No. *102 (95% UI) | ASIR per 100,000 No. (95% UI) | Incident cases No. *102 (95% UI) | ASIR per 100,000 No.(95% UI) | EAPC of ASIR No. (95% CI) |
| Afghanistan | 3.13 [2.1-4.46] | 28.25 [19.08-40.23] | 3 [2.19-4.02] | 25.35 [18.55-33.9] | -0.71 [-0.84 to -0.57] |
| Albania | 0.67 [0.5-0.88] | 21.09 [15.83-27.47] | 1.66 [1.26-2.13] | 21.18 [16.06-27.21] | 0.09 [-0.01 to 0.19] |
| Algeria | 4.91 [3.45-6.68] | 25.85 [18.39-34.88] | 9.56 [6.86-12.94] | 16.81 [12.14-22.62] | -1.74 [-1.87 to -1.61] |
| American Samoa | 0.01 [0.01-0.01] | 32.64 [23.68-43.93] | 0.02 [0.02-0.03] | 28.06 [21.35-36.31] | -0.51 [-0.56 to -0.47] |
| Andorra | 0.02 [0.01-0.02] | 18.33 [12.7-25.57] | 0.05 [0.03-0.06] | 16.59 [11.71-22.53] | -0.32 [-0.39 to -0.25] |
| Angola | 1.33 [0.89-1.89] | 22.36 [15.15-31.6] | 3.22 [2.2-4.54] | 17.38 [12.02-24.26] | -1.02 [-1.11 to -0.94] |
| Antigua and Barbuda | 0.03 [0.02-0.04] | 33.18 [24.38-43.64] | 0.05 [0.04-0.06] | 27.57 [20.73-35.11] | -0.71 [-0.78 to -0.63] |
| Argentina | 23.92 [18.05-31.07] | 43.31 [32.7-56.24] | 26.14 [20.19-33.18] | 27.5 [21.14-35.01] | -1.72 [-1.85 to -1.58] |
| Armenia | 1.11 [0.83-1.45] | 24.6 [18.57-32.05] | 1.17 [0.89-1.5] | 14.87 [11.39-19.16] | -1.98 [-2.19 to -1.78] |
| Australia | 7 [5.42-8.86] | 20.97 [16.18-26.64] | 13.89 [10.33-18.32] | 17.07 [12.47-22.87] | -0.69 [-0.81 to -0.58] |
| Austria | 7.65 [5.85-9.77] | 37.65 [28.59-48.36] | 8.03 [6.06-10.46] | 25.81 [19.19-34.03] | -0.76 [-1.03 to -0.48] |
| Azerbaijan | 1.51 [0.94-2.28] | 18.33 [11.46-27.68] | 2.43 [1.67-3.37] | 14.59 [10.31-19.86] | -0.49 [-0.65 to -0.33] |
| Bahamas | 0.06 [0.04-0.08] | 24.33 [17.65-32.59] | 0.15 [0.11-0.2] | 21.03 [15.49-27.71] | -0.56 [-0.62 to -0.51] |
| Bahrain | 0.04 [0.03-0.05] | 16 [11.09-22.45] | 0.13 [0.09-0.18] | 10.33 [7.52-13.75] | -1.6 [-1.71 to -1.5] |
| Bangladesh | 27.43 [18.99-38.28] | 37.67 [26.06-52.61] | 77.55 [55.93-105.12] | 34.46 [24.88-46.62] | -0.37 [-0.5 to -0.24] |
| Barbados | 0.15 [0.11-0.2] | 31.06 [22.83-40.86] | 0.23 [0.18-0.3] | 25.28 [19.08-33.09] | -0.67 [-0.79 to -0.54] |
| Belarus | 4.92 [3.58-6.61] | 21.46 [15.64-28.84] | 5.4 [4.1-7.02] | 18.35 [13.89-23.9] | -0.56 [-0.61 to -0.5] |
| Belgium | 4.58 [3.36-6.11] | 17.09 [12.39-22.96] | 6.83 [5.2-8.84] | 16 [11.87-21.15] | -0.43 [-0.75 to -0.11] |
| Belize | 0.04 [0.03-0.05] | 24.35 [17.64-32.36] | 0.1 [0.08-0.14] | 20.85 [15.42-27.45] | -0.71 [-0.78 to -0.63] |
| Benin | 0.5 [0.33-0.73] | 15.86 [10.44-23.23] | 1.07 [0.71-1.56] | 13.38 [8.97-19.4] | -0.7 [-0.75 to -0.64] |
| Bermuda | 0.03 [0.02-0.04] | 27.42 [19.9-36.81] | 0.05 [0.03-0.06] | 19.63 [14.17-26.38] | -1.37 [-1.47 to -1.26] |
| Bhutan | 0.11 [0.08-0.15] | 30.37 [21.31-41.92] | 0.21 [0.15-0.28] | 21.2 [15.29-28.15] | -1.43 [-1.54 to -1.33] |
| Bolivia (Plurinational State of) | 2.58 [1.86-3.42] | 50.79 [36.62-67.29] | 6.02 [4.46-7.96] | 40.5 [30.13-53.37] | -0.92 [-0.98 to -0.85] |
| Bosnia and Herzegovina | 2.02 [1.45-2.73] | 30.61 [22.07-41.21] | 2.69 [2.14-3.35] | 23.48 [18.53-29.34] | -0.96 [-1 to -0.91] |
| Botswana | 0.18 [0.12-0.26] | 20.78 [14.36-29.03] | 0.41 [0.28-0.56] | 18.03 [12.59-24.61] | -0.64 [-0.72 to -0.56] |
| Brazil | 42.84 [28.86-61.84] | 29.36 [19.84-42.24] | 112.04 [78.88-155.34] | 25.86 [18.21-35.82] | -0.65 [-0.73 to -0.57] |
| Brunei Darussalam | 0.11 [0.08-0.15] | 73.61 [51.97-98.9] | 0.28 [0.21-0.37] | 49.8 [37.83-63.86] | -1.71 [-1.88 to -1.55] |
| Bulgaria | 4.19 [3.24-5.42] | 20.25 [15.79-25.98] | 5.9 [4.81-7.16] | 22.71 [18.28-27.88] | 0.48 [0.42 to 0.54] |
| Burkina Faso | 0.94 [0.6-1.39] | 13.63 [8.75-20.14] | 1.74 [1.13-2.55] | 12.04 [7.89-17.52] | -0.45 [-0.51 to -0.4] |
| Burundi | 0.99 [0.67-1.42] | 26.7 [18.08-38.49] | 1.76 [1.17-2.56] | 23.05 [15.38-33.43] | -0.68 [-0.74 to -0.61] |
| Cabo Verde | 0.06 [0.04-0.09] | 14.13 [8.96-21.34] | 0.09 [0.06-0.13] | 11.8 [7.59-17.38] | -0.71 [-0.78 to -0.63] |
| Cambodia | 2.71 [1.94-3.69] | 41.03 [29.5-55.37] | 6.35 [4.71-8.37] | 32.57 [24.42-42.49] | -0.93 [-0.99 to -0.86] |
| Cameroon | 1 [0.66-1.48] | 14.27 [9.44-20.8] | 2.48 [1.66-3.56] | 12.79 [8.65-18.2] | -0.44 [-0.52 to -0.37] |
| Canada | 13.81 [10.17-18.21] | 24.98 [18.32-33.07] | 25.42 [18.88-33.18] | 19.38 [14.2-25.6] | -0.88 [-0.91 to -0.85] |
| Central African Republic | 0.42 [0.28-0.6] | 23.12 [15.36-33.29] | 0.73 [0.5-1.04] | 21.78 [14.99-30.69] | -0.24 [-0.26 to -0.21] |
| Chad | 0.69 [0.44-1.03] | 15.17 [9.71-22.7] | 1.24 [0.83-1.77] | 14.04 [9.44-19.9] | -0.35 [-0.41 to -0.28] |
| Chile | 4.86 [3.57-6.47] | 29 [21.32-38.52] | 11.81 [8.91-15.23] | 25.96 [19.52-33.56] | -0.18 [-0.25 to -0.1] |
| China | 817.22 [560.97-1157.04] | 67.61 [46.91-94.87] | 948.69 [677.39-1291.45] | 26.31 [18.87-35.66] | -4.1 [-4.54 to -3.67] |
| Colombia | 11.35 [8.44-14.69] | 40.12 [29.9-51.91] | 40.05 [30.63-51.31] | 41.11 [31.42-52.66] | -0.01 [-0.15 to 0.13] |
| Comoros | 0.08 [0.05-0.11] | 24.49 [16.5-35.58] | 0.16 [0.11-0.23] | 20.29 [13.79-29.09] | -0.77 [-0.83 to -0.71] |
| Congo | 0.37 [0.25-0.53] | 21.6 [14.58-30.74] | 0.71 [0.48-1] | 16.98 [11.77-23.8] | -0.98 [-1.06 to -0.9] |
| Cook Islands | 0.01 [0-0.01] | 34.16 [24.63-46.01] | 0.01 [0.01-0.01] | 21.53 [15.39-29.08] | -1.79 [-1.94 to -1.64] |
| Costa Rica | 0.91 [0.66-1.21] | 31.89 [23.29-42.33] | 2.53 [1.86-3.36] | 26.08 [19.2-34.66] | -0.72 [-0.78 to -0.66] |
| Croatia | 2.41 [1.87-3.07] | 22.53 [17.56-28.55] | 2.62 [2.14-3.18] | 15.79 [12.8-19.36] | -1.47 [-1.61 to -1.33] |
| Cuba | 4.1 [2.98-5.54] | 24.15 [17.5-32.69] | 6.86 [5.02-9.15] | 19.69 [14.33-26.33] | -0.82 [-0.89 to -0.76] |
| Cyprus | 0.44 [0.33-0.58] | 32.19 [23.99-42.28] | 0.7 [0.52-0.91] | 19.98 [14.86-26.35] | -2.1 [-2.27 to -1.92] |
| Czechia | 5.39 [4.2-6.87] | 22.57 [17.55-28.88] | 5.92 [4.63-7.53] | 15.29 [11.79-19.72] | -1.52 [-1.64 to -1.39] |
| Côte d'Ivoire | 0.87 [0.56-1.3] | 14.44 [9.39-21.37] | 2.11 [1.4-3.08] | 12.35 [8.24-17.81] | -0.62 [-0.68 to -0.55] |
| Democratic People's Republic of Korea | 11.87 [8.6-15.99] | 50.72 [37.01-67.99] | 20.37 [14.94-27.17] | 37.33 [27.36-49.79] | -1.25 [-1.36 to -1.15] |
| Democratic Republic of the Congo | 5.69 [3.74-8.31] | 22.82 [15.15-33.07] | 12.94 [8.66-18.92] | 22.36 [15.05-32.42] | -0.06 [-0.11 to -0.02] |
| Denmark | 3.66 [2.79-4.78] | 27.46 [20.68-36.23] | 4.25 [3.23-5.52] | 20.53 [15.3-27.01] | -1.02 [-1.15 to -0.88] |
| Djibouti | 0.05 [0.03-0.07] | 23.81 [16.07-33.86] | 0.2 [0.14-0.29] | 20.8 [14.06-29.53] | -0.54 [-0.6 to -0.48] |
| Dominica | 0.03 [0.02-0.04] | 26.74 [19.35-35.86] | 0.03 [0.02-0.04] | 22.45 [16.4-29.94] | -0.62 [-0.75 to -0.5] |
| Dominican Republic | 1.41 [1-1.91] | 23.59 [16.78-31.83] | 4.51 [3.34-5.96] | 26.88 [19.88-35.49] | 0.58 [0.51 to 0.65] |
| Ecuador | 3.35 [2.47-4.46] | 39.27 [28.97-52.24] | 10.71 [8.05-13.8] | 38.7 [29.07-49.88] | 0.09 [-0.02 to 0.21] |
| Egypt | 7.79 [5.33-10.94] | 20.09 [13.93-27.93] | 13.7 [9.85-18.35] | 14.56 [10.72-19.19] | -1.2 [-1.26 to -1.13] |
| El Salvador | 1.71 [1.23-2.31] | 34.86 [25.04-47.06] | 2.84 [2.09-3.74] | 26.2 [19.16-34.71] | -1 [-1.18 to -0.82] |
| Equatorial Guinea | 0.07 [0.05-0.1] | 23.5 [15.94-33.7] | 0.11 [0.07-0.16] | 14.43 [9.68-20.71] | -1.91 [-2.09 to -1.72] |
| Eritrea | 0.44 [0.29-0.65] | 26.31 [17.65-38.15] | 0.93 [0.62-1.34] | 21.92 [14.86-31.46] | -0.74 [-0.8 to -0.67] |
| Estonia | 0.7 [0.52-0.94] | 19.67 [14.43-26.3] | 0.73 [0.53-0.97] | 15.4 [11.15-20.62] | -0.95 [-1.02 to -0.87] |
| Eswatini | 0.08 [0.05-0.11] | 18.48 [12.85-25.93] | 0.14 [0.1-0.2] | 17.36 [12.49-23.6] | -0.19 [-0.32 to -0.06] |
| Ethiopia | 9.01 [5.96-13.27] | 29.38 [19.52-42.99] | 12.57 [8.44-18.11] | 19.14 [12.9-27.44] | -1.78 [-1.95 to -1.6] |
| Fiji | 0.26 [0.2-0.35] | 55.12 [41.35-71.9] | 0.51 [0.39-0.67] | 45.52 [35.03-58.29] | -0.89 [-0.99 to -0.8] |
| Finland | 4.14 [3.32-5.04] | 34.61 [27.72-42.23] | 5.66 [4.32-7.23] | 27.02 [20.34-34.9] | -0.97 [-1.25 to -0.69] |
| France | 25.01 [18.87-32.41] | 17.11 [12.77-22.38] | 44.49 [34.42-56.83] | 17.18 [12.93-22.45] | 0.16 [0.1 to 0.21] |
| Gabon | 0.2 [0.13-0.28] | 20.29 [13.78-29.03] | 0.28 [0.19-0.4] | 16.13 [11.01-22.72] | -0.94 [-1.03 to -0.84] |
| Gambia | 0.07 [0.05-0.11] | 13.97 [9.05-20.5] | 0.19 [0.13-0.28] | 12.83 [8.45-18.5] | -0.33 [-0.37 to -0.28] |
| Georgia | 4.5 [3.43-5.78] | 42.3 [32.29-54.14] | 5.47 [4.45-6.67] | 48.84 [39.56-59.77] | 0.87 [0.72 to 1.03] |
| Germany | 48.31 [36.03-63.05] | 22.4 [16.53-29.43] | 57.14 [42.38-75.71] | 16.51 [11.89-22.32] | -1.1 [-1.17 to -1.04] |
| Ghana | 1.49 [0.96-2.18] | 15.29 [9.91-22.31] | 3.66 [2.45-5.22] | 13.99 [9.46-19.78] | -0.28 [-0.37 to -0.2] |
| Greece | 5.42 [3.89-7.29] | 20.37 [14.61-27.45] | 8.11 [6.17-10.48] | 19.2 [14.09-25.54] | 0.05 [-0.13 to 0.22] |
| Greenland | 0.02 [0.01-0.03] | 33.58 [21.07-59.71] | 0.04 [0.03-0.05] | 36.03 [28.59-45.03] | 0.33 [0.19 to 0.47] |
| Grenada | 0.04 [0.03-0.05] | 33.55 [25.22-43.65] | 0.05 [0.04-0.06] | 25.94 [19.8-33.1] | -0.99 [-1.08 to -0.89] |
| Guam | 0.04 [0.03-0.05] | 32.65 [23.93-43.64] | 0.09 [0.06-0.11] | 21.49 [15.8-28.47] | -1.61 [-1.76 to -1.47] |
| Guatemala | 1.13 [0.77-1.57] | 20.49 [14.17-28.3] | 3.72 [2.7-4.97] | 20.54 [14.96-27.45] | 0.1 [0.05 to 0.15] |
| Guinea | 0.85 [0.55-1.26] | 15.79 [10.24-23.27] | 1.32 [0.88-1.9] | 14.82 [9.99-21.37] | -0.24 [-0.28 to -0.21] |
| Guinea-Bissau | 0.09 [0.06-0.14] | 15.54 [10.24-22.58] | 0.15 [0.1-0.22] | 13.66 [9.09-19.79] | -0.5 [-0.54 to -0.46] |
| Guyana | 0.22 [0.16-0.29] | 36.59 [27.31-47.78] | 0.3 [0.23-0.39] | 27.78 [21.36-35.66] | -1.27 [-1.41 to -1.13] |
| Haiti | 2.04 [1.38-2.86] | 39.21 [26.62-54.85] | 4.27 [3.05-5.82] | 37.9 [27.23-51.32] | -0.26 [-0.34 to -0.18] |
| Honduras | 1.01 [0.71-1.42] | 31.8 [22.19-44.29] | 3.92 [2.9-5.19] | 39.38 [29.24-51.82] | 0.8 [0.74 to 0.87] |
| Hungary | 4.11 [3.19-5.3] | 16.15 [12.51-20.86] | 4.98 [3.89-6.29] | 14.09 [10.86-18.04] | -0.55 [-0.59 to -0.51] |
| Iceland | 0.14 [0.1-0.18] | 27.45 [20.07-36.93] | 0.21 [0.15-0.28] | 19.93 [14.4-26.95] | -1.24 [-1.32 to -1.15] |
| India | 213.85 [145.61-306.37] | 30.16 [20.7-42.87] | 379.17 [265.88-525.15] | 19.6 [13.79-27.03] | -1.77 [-1.91 to -1.63] |
| Indonesia | 54.18 [36.86-77.09] | 36.54 [25.06-51.57] | 115.15 [80.85-159.57] | 30.62 [21.76-41.99] | -0.66 [-0.72 to -0.61] |
| Iran (Islamic Republic of) | 7.59 [5.14-10.86] | 19.47 [13.43-27.5] | 15.23 [10.58-21.28] | 12.35 [8.64-17.19] | -1.72 [-1.84 to -1.61] |
| Iraq | 3.04 [2.22-4.02] | 24.31 [17.81-32.18] | 4.46 [3.21-5.98] | 12.7 [9.31-16.77] | -2.61 [-2.87 to -2.35] |
| Ireland | 2.33 [1.76-3.06] | 34.19 [25.74-45.2] | 2.94 [2.23-3.78] | 21.31 [16.03-27.67] | -1.86 [-1.99 to -1.73] |
| Israel | 1.45 [1.04-1.98] | 18.04 [12.8-24.75] | 3.21 [2.33-4.3] | 15.04 [10.71-20.47] | -0.71 [-0.76 to -0.66] |
| Italy | 28.11 [18.72-40.91] | 18.19 [12.07-26.54] | 37.1 [27.79-48.01] | 14.17 [10.47-18.52] | -0.83 [-0.88 to -0.77] |
| Jamaica | 0.93 [0.66-1.27] | 31.23 [22-42.93] | 1.56 [1.19-2.01] | 28.82 [21.95-37.2] | -0.29 [-0.38 to -0.19] |
| Japan | 165.28 [114.14-232.87] | 55.94 [38.57-78.84] | 255.29 [187.2-339.21] | 47.11 [34.21-63.25] | -0.65 [-0.75 to -0.54] |
| Jordan | 0.31 [0.22-0.43] | 16.04 [11.32-21.99] | 1.22 [0.85-1.7] | 10.61 [7.54-14.52] | -1.66 [-1.8 to -1.51] |
| Kazakhstan | 5.61 [4.22-7.38] | 27.94 [21.07-36.62] | 8.57 [6.65-10.9] | 29.8 [23.39-37.51] | 0.27 [0.24 to 0.3] |
| Kenya | 2.74 [1.83-4.01] | 21.33 [14.24-31.07] | 6.44 [4.35-9.27] | 18.14 [12.37-25.88] | -0.55 [-0.64 to -0.46] |
| Kiribati | 0.03 [0.02-0.04] | 49.53 [35.28-66.93] | 0.05 [0.04-0.07] | 47.58 [35.63-61.61] | -0.21 [-0.24 to -0.18] |
| Kuwait | 0.12 [0.09-0.17] | 14.84 [10.46-20.56] | 0.56 [0.39-0.77] | 13.06 [9.47-17.7] | -0.49 [-0.55 to -0.43] |
| Kyrgyzstan | 1.34 [1-1.75] | 26.56 [19.86-34.65] | 1.84 [1.42-2.37] | 22.74 [17.64-29.03] | -0.54 [-0.6 to -0.48] |
| Lao People's Democratic Republic | 1.21 [0.85-1.64] | 38.96 [27.63-52.62] | 1.93 [1.41-2.59] | 27.31 [20.02-36.28] | -1.44 [-1.56 to -1.31] |
| Latvia | 1.54 [1.15-2.02] | 24.64 [18.36-32.31] | 1.17 [0.87-1.53] | 16.72 [12.33-22.1] | -1.56 [-1.68 to -1.45] |
| Lebanon | 0.78 [0.54-1.08] | 22.44 [15.74-30.74] | 1.37 [0.98-1.88] | 13.13 [9.26-18.09] | -2.12 [-2.27 to -1.98] |
| Lesotho | 0.25 [0.17-0.36] | 18.46 [12.51-26.11] | 0.36 [0.25-0.48] | 21.24 [15.3-28.36] | 0.6 [0.49 to 0.72] |
| Liberia | 0.28 [0.18-0.42] | 15.52 [9.96-23.03] | 0.43 [0.28-0.63] | 13.76 [8.95-20.06] | -0.54 [-0.6 to -0.48] |
| Libya | 0.5 [0.33-0.73] | 16.75 [11.07-24.48] | 0.92 [0.64-1.28] | 11.68 [8.23-16.06] | -1.4 [-1.55 to -1.25] |
| Lithuania | 1.58 [1.2-2.03] | 19.98 [15.19-25.63] | 1.57 [1.2-2.05] | 15.35 [11.57-20.15] | -0.82 [-0.86 to -0.78] |
| Luxembourg | 0.18 [0.13-0.24] | 19.19 [14.06-25.72] | 0.27 [0.2-0.36] | 14.27 [10.31-19.27] | -1.39 [-1.62 to -1.16] |
| Madagascar | 2.24 [1.5-3.24] | 27.32 [18.29-39.37] | 4.6 [3.08-6.64] | 25.96 [17.52-37.17] | -0.27 [-0.32 to -0.22] |
| Malawi | 1.38 [0.89-2.02] | 22.84 [14.9-33.33] | 2.29 [1.52-3.3] | 20.24 [13.49-29.07] | -0.5 [-0.55 to -0.46] |
| Malaysia | 5.88 [4.26-7.93] | 41 [29.8-55.05] | 11.41 [8.41-15.15] | 24.53 [18.21-32.4] | -1.89 [-2 to -1.79] |
| Maldives | 0.06 [0.04-0.08] | 44.2 [31.97-59.72] | 0.13 [0.09-0.17] | 24.85 [18.17-33.07] | -2.22 [-2.37 to -2.07] |
| Mali | 0.95 [0.61-1.42] | 15.15 [9.78-22.42] | 1.74 [1.14-2.56] | 12.93 [8.52-18.85] | -0.66 [-0.72 to -0.6] |
| Malta | 0.15 [0.1-0.2] | 20.13 [14.15-27.55] | 0.25 [0.18-0.34] | 15.26 [10.55-21.1] | -1.3 [-1.44 to -1.16] |
| Marshall Islands | 0.01 [0.01-0.02] | 56.68 [40.62-77.36] | 0.02 [0.02-0.03] | 49.48 [37.45-64.42] | -0.62 [-0.69 to -0.54] |
| Mauritania | 0.25 [0.16-0.36] | 15.34 [10.06-22.3] | 0.43 [0.28-0.63] | 12.39 [8.12-18.05] | -0.84 [-0.89 to -0.78] |
| Mauritius | 0.36 [0.27-0.47] | 30.63 [22.85-40.26] | 0.8 [0.6-1.04] | 24.21 [18.16-31.43] | -1.06 [-1.18 to -0.94] |
| Mexico | 16.69 [11.34-23.98] | 24.73 [16.82-35.42] | 56.24 [39.27-77.47] | 26.45 [18.51-36.39] | 0.27 [0.22 to 0.31] |
| Micronesia (Federated States of) | 0.04 [0.03-0.06] | 56.76 [40.74-76.82] | 0.06 [0.04-0.07] | 50.83 [38.18-65.96] | -0.5 [-0.55 to -0.44] |
| Monaco | 0.03 [0.02-0.04] | 22.55 [16.15-30.71] | 0.02 [0.02-0.03] | 14.5 [10.19-20.15] | -1.64 [-1.77 to -1.51] |
| Mongolia | 0.6 [0.43-0.81] | 36.78 [26.23-49.75] | 1.47 [1.14-1.88] | 45.35 [35.49-57.06] | 0.68 [0.5 to 0.86] |
| Montenegro | 0.15 [0.11-0.2] | 14.3 [10.4-19.07] | 0.23 [0.17-0.29] | 13.76 [10.54-17.65] | -0.03 [-0.13 to 0.07] |
| Morocco | 5.57 [3.86-7.75] | 24.58 [17.06-34.13] | 10.98 [8.08-14.5] | 19.55 [14.48-25.73] | -0.92 [-0.98 to -0.85] |
| Mozambique | 2.42 [1.58-3.57] | 25.59 [16.75-37.6] | 4.3 [2.93-6.1] | 24.48 [16.76-34.62] | -0.15 [-0.17 to -0.13] |
| Myanmar | 14.55 [10.25-19.86] | 40.83 [28.98-55.49] | 20.8 [15.09-27.64] | 26.19 [19.15-34.64] | -1.78 [-1.96 to -1.6] |
| Namibia | 0.22 [0.15-0.31] | 21.48 [15.03-29.78] | 0.38 [0.27-0.52] | 17.84 [12.67-24.15] | -0.82 [-0.92 to -0.72] |
| Nauru | 0 [0-0] | 40.18 [28.68-54.3] | 0 [0-0] | 28.1 [20.3-37.59] | -1.41 [-1.53 to -1.3] |
| Nepal | 4.39 [3-6.21] | 30.67 [21.02-43.3] | 9.67 [6.89-13.17] | 25.74 [18.4-34.97] | -0.7 [-0.76 to -0.64] |
| Netherlands | 8.18 [6.05-10.73] | 24.13 [17.68-31.93] | 10.81 [8.1-14.24] | 17.47 [12.89-23.3] | -0.98 [-1.06 to -0.9] |
| New Zealand | 1.71 [1.13-2.49] | 25.61 [16.86-37.43] | 2.47 [1.81-3.31] | 16.29 [11.82-21.95] | -1.67 [-1.8 to -1.55] |
| Nicaragua | 0.86 [0.61-1.16] | 35.56 [25.47-47.73] | 2.31 [1.68-3.06] | 28.81 [20.97-38.08] | -0.79 [-0.85 to -0.74] |
| Niger | 0.66 [0.42-0.99] | 15.72 [10-23.51] | 1.91 [1.24-2.81] | 14.62 [9.58-21.36] | -0.33 [-0.38 to -0.28] |
| Nigeria | 10.5 [6.91-15.38] | 14.9 [9.86-21.74] | 14.92 [9.86-21.92] | 10.38 [6.93-15.09] | -1.56 [-1.71 to -1.4] |
| Niue | 0 [0-0] | 45.85 [33.52-61.34] | 0 [0-0] | 31.06 [23.01-40.9] | -1.49 [-1.58 to -1.4] |
| North Macedonia | 1.02 [0.76-1.32] | 33.04 [24.96-42.68] | 2.05 [1.65-2.51] | 40.92 [33-49.78] | 0.72 [0.56 to 0.88] |
| Northern Mariana Islands | 0.01 [0.01-0.01] | 39.67 [28.79-53.36] | 0.03 [0.02-0.03] | 32.41 [24.48-41.88] | -0.7 [-0.77 to -0.64] |
| Norway | 3.15 [2.14-4.51] | 27.21 [18.38-39.17] | 3.48 [2.46-4.79] | 19.34 [13.51-26.93] | -0.93 [-1.13 to -0.72] |
| Oman | 0.31 [0.2-0.53] | 33.21 [21.3-56.91] | 1.03 [0.78-1.32] | 41.9 [32.1-53.23] | 0.76 [0.67 to 0.86] |
| Pakistan | 30.92 [21.27-44.08] | 35.16 [24.26-49.96] | 49.47 [34.78-67.86] | 26.5 [18.74-36.14] | -1.19 [-1.34 to -1.04] |
| Palau | 0.01 [0-0.01] | 46.81 [34.49-62.22] | 0.01 [0.01-0.02] | 31.79 [23.9-41.22] | -1.43 [-1.51 to -1.35] |
| Palestine | 0.23 [0.16-0.31] | 16.73 [11.9-22.75] | 0.48 [0.33-0.65] | 12.54 [8.97-16.88] | -1.04 [-1.11 to -0.97] |
| Panama | 0.94 [0.68-1.25] | 39.06 [28.1-51.8] | 2.62 [1.96-3.41] | 34.1 [25.4-44.45] | -0.53 [-0.58 to -0.47] |
| Papua New Guinea | 0.95 [0.67-1.32] | 39.63 [28.18-53.98] | 2.18 [1.57-2.91] | 31.5 [22.95-41.58] | -0.88 [-0.94 to -0.82] |
| Paraguay | 1.11 [0.81-1.46] | 30.66 [22.45-40.29] | 2.83 [2.13-3.63] | 28.62 [21.61-36.66] | -0.04 [-0.11 to 0.02] |
| Peru | 7.12 [5.1-9.71] | 36.41 [26.13-49.61] | 13.7 [10.03-18.11] | 24.09 [17.61-31.86] | -1.42 [-1.57 to -1.28] |
| Philippines | 8.98 [6.01-13.05] | 20.84 [14.04-30.01] | 30.74 [21.52-42.83] | 23.29 [16.41-32.23] | 0.68 [0.48 to 0.88] |
| Poland | 16.55 [11.33-23.43] | 21.72 [14.88-30.7] | 17.95 [12.74-24.53] | 14.02 [9.9-19.25] | -1.88 [-2.05 to -1.7] |
| Portugal | 5.92 [4.44-7.68] | 24.74 [18.5-32.1] | 7.83 [6.05-9.83] | 16.38 [12.06-21.2] | -1.58 [-1.71 to -1.46] |
| Puerto Rico | 1.42 [1.01-1.92] | 23.27 [16.54-31.69] | 2.3 [1.67-3.08] | 18.27 [12.97-24.85] | -0.94 [-1.05 to -0.83] |
| Qatar | 0.03 [0.02-0.04] | 21.66 [15.53-29.43] | 0.22 [0.15-0.31] | 21.26 [15.98-27.81] | 0.18 [0.04 to 0.31] |
| Republic of Korea | 31.31 [22.62-42.08] | 64.83 [46.98-86.74] | 54.36 [40.27-71.41] | 32.37 [23.96-42.54] | -2.34 [-2.63 to -2.05] |
| Republic of Moldova | 1.25 [0.91-1.7] | 17.07 [12.49-22.91] | 1.4 [1.02-1.84] | 13.06 [9.52-17.15] | -1.03 [-1.1 to -0.95] |
| Romania | 14.67 [11.61-18.33] | 32.09 [25.49-39.93] | 23.45 [19.54-27.86] | 32.62 [26.92-39.1] | -0.08 [-0.14 to -0.02] |
| Russian Federation | 75.8 [51.73-107.71] | 24.62 [16.83-34.9] | 118.49 [85.68-160.26] | 27.26 [19.66-36.95] | 0.02 [-0.46 to 0.51] |
| Rwanda | 1.33 [0.89-1.9] | 29.19 [19.6-41.58] | 2.13 [1.45-3.05] | 21.19 [14.49-30.11] | -1.4 [-1.53 to -1.27] |
| Saint Kitts and Nevis | 0.02 [0.02-0.03] | 36.45 [27.52-47.3] | 0.03 [0.02-0.04] | 26.34 [20.04-33.67] | -1.2 [-1.3 to -1.1] |
| Saint Lucia | 0.05 [0.04-0.06] | 33.26 [24.44-44.44] | 0.1 [0.07-0.13] | 23.49 [17.7-30.76] | -1.34 [-1.46 to -1.23] |
| Saint Vincent and the Grenadines | 0.03 [0.02-0.04] | 25.46 [18.09-33.97] | 0.05 [0.04-0.06] | 19.35 [14.42-25.35] | -0.96 [-1.1 to -0.81] |
| Samoa | 0.06 [0.04-0.08] | 46.67 [33.57-62.49] | 0.08 [0.06-0.11] | 36.03 [26.64-47.69] | -0.98 [-1.03 to -0.93] |
| San Marino | 0.01 [0.01-0.02] | 18.44 [12.87-25.46] | 0.02 [0.01-0.02] | 14.27 [9.81-19.92] | -1.01 [-1.1 to -0.93] |
| Sao Tome and Principe | 0.02 [0.01-0.02] | 14.79 [9.66-21.65] | 0.02 [0.02-0.03] | 13.36 [8.83-19.23] | -0.47 [-0.53 to -0.4] |
| Saudi Arabia | 1.22 [0.86-1.67] | 14.9 [10.57-20.21] | 2.56 [1.74-3.64] | 9.64 [6.78-13.35] | -1.64 [-1.75 to -1.54] |
| Senegal | 0.71 [0.46-1.06] | 13.94 [9.01-20.68] | 1.52 [0.99-2.21] | 12.12 [7.98-17.54] | -0.51 [-0.56 to -0.46] |
| Serbia | 6.14 [4.76-7.79] | 33.01 [25.72-41.69] | 9.95 [8.15-11.99] | 32.15 [26.21-38.91] | -0.32 [-0.42 to -0.22] |
| Seychelles | 0.02 [0.02-0.03] | 25.18 [17.45-35.18] | 0.03 [0.02-0.05] | 16.98 [11.71-23.62] | -1.42 [-1.54 to -1.31] |
| Sierra Leone | 0.47 [0.3-0.7] | 14.41 [9.26-21.54] | 0.78 [0.51-1.13] | 13.3 [8.79-19.31] | -0.29 [-0.35 to -0.24] |
| Singapore | 1.46 [1.07-1.98] | 40.2 [29.61-54.29] | 3.72 [2.58-5.1] | 24.36 [16.97-33.34] | -1.99 [-2.13 to -1.85] |
| Slovakia | 2.54 [1.96-3.24] | 24.46 [18.88-31.2] | 2.34 [1.78-3.04] | 13.84 [10.51-18.08] | -2.4 [-2.6 to -2.2] |
| Slovenia | 0.75 [0.55-0.99] | 17.29 [12.72-22.89] | 1 [0.74-1.33] | 12.15 [8.89-16.32] | -1.65 [-1.81 to -1.48] |
| Solomon Islands | 0.11 [0.07-0.16] | 57.49 [37.91-83.73] | 0.31 [0.23-0.41] | 66.23 [49.83-86.2] | 0.19 [0.07 to 0.31] |
| Somalia | 0.88 [0.57-1.33] | 25.78 [16.75-38.44] | 2.23 [1.46-3.29] | 24.87 [16.35-36.43] | -0.14 [-0.18 to -0.1] |
| South Africa | 4.98 [3.32-7.26] | 15.04 [10.05-21.87] | 10.26 [6.96-14.61] | 13.58 [9.27-19.22] | -0.49 [-0.69 to -0.3] |
| South Sudan | 0.87 [0.58-1.25] | 21.58 [14.51-30.75] | 1.15 [0.76-1.66] | 19.77 [13.25-28.2] | -0.34 [-0.43 to -0.26] |
| Spain | 17.35 [12.36-23.52] | 18.06 [12.8-24.54] | 30.15 [23.49-38.11] | 16.85 [12.76-21.82] | -0.21 [-0.3 to -0.12] |
| Sri Lanka | 8.07 [5.87-10.7] | 51.56 [37.78-67.94] | 15.68 [11.55-20.6] | 34.87 [25.9-45.62] | -1.45 [-1.6 to -1.3] |
| Sudan | 3.68 [2.52-5.19] | 25.92 [17.75-36.4] | 5.22 [3.72-7.03] | 18.21 [13.09-24.41] | -1.48 [-1.59 to -1.36] |
| Suriname | 0.12 [0.09-0.16] | 28.48 [20.61-38.35] | 0.29 [0.21-0.37] | 25.85 [19.21-33.71] | -0.48 [-0.57 to -0.39] |
| Sweden | 6.51 [4.44-9.22] | 26.05 [17.59-37.2] | 7.16 [5.05-9.85] | 19.14 [13.33-26.59] | -1.14 [-1.26 to -1.03] |
| Switzerland | 3.72 [2.79-4.87] | 20.98 [15.49-27.72] | 4.93 [3.65-6.58] | 15.32 [11.06-20.84] | -0.94 [-1.24 to -0.64] |
| Syrian Arab Republic | 1.61 [1.06-2.36] | 19.94 [13.19-29.06] | 2.87 [2.04-3.9] | 14.27 [10.43-19.03] | -1.46 [-1.61 to -1.31] |
| Taiwan (Province of China) | 7.46 [5.09-10.65] | 29.17 [20.08-41.39] | 17.6 [12.79-23.53] | 22.56 [16.35-30.25] | -0.75 [-0.84 to -0.66] |
| Tajikistan | 1.23 [0.9-1.62] | 27.15 [19.91-35.82] | 3.22 [2.43-4.15] | 37.84 [29.1-48.14] | 1.37 [1.16 to 1.57] |
| Thailand | 36.28 [26.69-48.29] | 67.49 [49.98-89.44] | 76.67 [57.96-98.89] | 39.06 [29.53-50.37] | -2.2 [-2.39 to -2.02] |
| Timor-Leste | 0.12 [0.09-0.17] | 32.08 [22.59-43.75] | 0.36 [0.26-0.48] | 26.61 [19.36-35.54] | -0.75 [-0.82 to -0.68] |
| Togo | 0.28 [0.18-0.41] | 14.71 [9.54-21.74] | 0.78 [0.51-1.15] | 13.17 [8.73-19.17] | -0.43 [-0.47 to -0.39] |
| Tokelau | 0 [0-0] | 49.55 [34.93-67.34] | 0 [0-0] | 32.45 [23.6-43.61] | -1.7 [-1.83 to -1.58] |
| Tonga | 0.03 [0.02-0.04] | 33.86 [23.49-47.24] | 0.03 [0.03-0.05] | 25.92 [18.61-35.02] | -1.02 [-1.09 to -0.94] |
| Trinidad and Tobago | 0.42 [0.31-0.55] | 30.83 [22.7-40.61] | 0.88 [0.66-1.14] | 25.58 [19.03-32.85] | -0.67 [-0.71 to -0.64] |
| Tunisia | 1.88 [1.29-2.64] | 23.35 [16.21-32.62] | 3.64 [2.61-4.91] | 16.23 [11.67-21.81] | -1.47 [-1.57 to -1.36] |
| Turkmenistan | 0.78 [0.57-1.04] | 25.41 [18.87-33.68] | 2.04 [1.56-2.61] | 31.03 [24.06-39.37] | 1.02 [0.89 to 1.16] |
| Tuvalu | 0.01 [0-0.01] | 55.19 [39.36-74.96] | 0.01 [0-0.01] | 40.86 [29.76-54.09] | -1.19 [-1.27 to -1.12] |
| Uganda | 2.4 [1.56-3.53] | 23.66 [15.46-34.69] | 4.54 [3.04-6.54] | 19.89 [13.39-28.51] | -0.71 [-0.78 to -0.64] |
| Ukraine | 37.36 [25.42-53.01] | 30.59 [20.81-43.4] | 32.14 [22.93-43.77] | 22.75 [16.12-31.09] | -1.1 [-1.17 to -1.04] |
| United Arab Emirates | 0.1 [0.07-0.15] | 21.47 [15.05-29.71] | 0.7 [0.47-0.99] | 14.53 [10.51-19.36] | -1.56 [-1.76 to -1.35] |
| United Kingdom | 40.89 [28.89-56.47] | 26.87 [18.89-37.27] | 46.42 [34.16-61.85] | 19.58 [14.22-26.42] | -1.27 [-1.38 to -1.16] |
| United Republic of Tanzania | 4.14 [2.74-6.02] | 23.65 [15.68-34.32] | 8.1 [5.48-11.53] | 20.19 [13.74-28.59] | -0.64 [-0.69 to -0.58] |
| United States of America | 99.68 [67.37-142.73] | 18.36 [12.34-26.4] | 193.89 [137.45-265.83] | 18.13 [12.76-24.98] | -0.22 [-0.42 to -0.03] |
| United States Virgin Islands | 0.04 [0.03-0.06] | 30.63 [22-41.66] | 0.08 [0.06-0.11] | 25.42 [18.74-33.27] | -0.65 [-0.72 to -0.57] |
| Uruguay | 2.89 [2.19-3.75] | 42.82 [32.39-55.58] | 3.53 [2.74-4.48] | 36.4 [27.93-46.57] | -0.57 [-0.69 to -0.45] |
| Uzbekistan | 3.08 [2.13-4.37] | 15.92 [11-22.6] | 7.63 [5.73-9.98] | 18.75 [14.37-24.09] | 0.75 [0.61 to 0.88] |
| Vanuatu | 0.04 [0.03-0.05] | 44.24 [31.62-59.86] | 0.1 [0.07-0.13] | 39.63 [29.39-52.38] | -0.47 [-0.52 to -0.42] |
| Venezuela (Bolivarian Republic of) | 5.16 [3.79-6.79] | 33.38 [24.58-43.93] | 16.06 [12.1-20.89] | 30.98 [23.41-40.21] | -0.26 [-0.31 to -0.22] |
| Viet Nam | 25.69 [17.61-35.6] | 38.44 [26.47-53.1] | 49.32 [35.53-66.48] | 29.89 [21.75-40.04] | -1.04 [-1.12 to -0.96] |
| Yemen | 1.94 [1.34-2.66] | 26.61 [18.63-36.4] | 4.64 [3.35-6.2] | 22.69 [16.51-30.17] | -0.75 [-0.84 to -0.66] |
| Zambia | 1.09 [0.74-1.57] | 24.78 [16.84-35.45] | 2.39 [1.66-3.38] | 23.11 [16.1-32.32] | -0.35 [-0.4 to -0.3] |
| Zimbabwe | 1.27 [0.86-1.82] | 20 [13.56-28.46] | 2.35 [1.63-3.26] | 22.74 [15.97-31.26] | 0.68 [0.57 to 0.79] |

**eTable 2. Deaths of SAH aged 55 and older between 1990 and 2021 at the global, regional levels the and national level**

|  | **1990** |  | **2021** |  | **1990-2021** |
| --- | --- | --- | --- | --- | --- |
|  | Death cases No. *102 (95% UI) | ASMR per 100,000 No. (95% UI) | Death cases No. *102 (95% UI) | ASMR per 100,000 No.(95% UI) | EAPC of ASMR No. (95% CI) |
| Overall | 2688.14 [1811.41-3431.21] | 42.14 [28.37-53.82] | 2680.04 [2269.21-3094.94] | 18.03 [15.27-20.83] | -3.23 [-3.49 to -2.96] |
| Sex |  |  |  |  |  |
| Female | 1464.79 [963.29-1852.01] | 40.9 [26.97-51.69] | 1432.4 [1209.31-1695.93] | 17.35 [14.71-20.54] | -3.28 [-3.54 to -3.01] |
| Male | 1223.35 [572.19-1724.6] | 43.68 [20.29-61.77] | 1247.65 [956.64-1575.29] | 18.86 [14.49-23.75] | -3.18 [-3.44 to -2.91] |
| Socio-demographic index |  |  |  |  |  |
| High SDI | 402.28 [368.1-428.81] | 20.73 [19.01-22.09] | 507.44 [432.64-550.41] | 12.23 [10.71-13.14] | -1.84 [-2 to -1.68] |
| High-middle SDI | 657.69 [469.54-826.59] | 40.91 [29.22-51.43] | 551.79 [474.02-667.86] | 15.67 [13.46-18.96] | -3.64 [-3.9 to -3.38] |
| Middle SDI | 1279.65 [642.33-1671.98] | 85.74 [42.49-112.37] | 1029.03 [805.08-1234.96] | 23.61 [18.39-28.4] | -4.96 [-5.49 to -4.44] |
| Low-middle SDI | 272.05 [168.37-430.91] | 29.31 [17.89-47.28] | 467.7 [353.35-627.38] | 20.5 [15.42-27.67] | -1.2 [-1.24 to -1.15] |
| Low SDI | 74.82 [34.8-139.02] | 21.94 [10.02-41.45] | 121.92 [65.76-240.24] | 16.09 [8.64-31.85] | -1.05 [-1.12 to -0.99] |
| Region |  |  |  |  |  |
| Andean Latin America | 9.5 [7.16-13.09] | 29.02 [21.81-40.14] | 23.72 [18.36-29.92] | 23.91 [18.5-30.15] | -0.72 [-0.9 to -0.53] |
| Australasia | 7.46 [6.51-8.45] | 18.37 [16.01-20.83] | 11.12 [9.21-12.83] | 10.49 [8.79-12.07] | -1.85 [-1.99 to -1.72] |
| Caribbean | 9.34 [7.4-12.19] | 21.84 [17.32-28.49] | 15.92 [12.13-20.57] | 16.95 [12.9-21.94] | -0.83 [-0.92 to -0.74] |
| Central Asia | 14.47 [12.56-16.75] | 19.13 [16.56-22.2] | 30.05 [26.49-33.89] | 23.9 [21.07-26.88] | 0.95 [0.71 to 1.19] |
| Central Europe | 50.89 [46.87-55.16] | 19.69 [18.09-21.38] | 57.14 [51.18-62.75] | 14.08 [12.63-15.46] | -1.23 [-1.52 to -0.94] |
| Central Latin America | 20.85 [19.29-22.43] | 16.05 [14.8-17.29] | 82.4 [71.64-93.2] | 19.46 [16.94-21.99] | 0.78 [0.56 to 1] |
| Central Sub-Saharan Africa | 5 [2.04-11.81] | 15.44 [6.07-37.66] | 10.75 [3.98-30.75] | 13.89 [5.11-39.78] | -0.4 [-0.49 to -0.32] |
| East Asia | 1539.18 [705.37-2051.35] | 129.86 [58.84-173.37] | 823.49 [583.45-1057.95] | 22.58 [15.97-29.01] | -6.67 [-7.36 to -5.97] |
| Eastern Europe | 104.95 [95.57-114.96] | 22.75 [20.59-25.01] | 144.38 [129.36-157.8] | 22.44 [20.12-24.53] | -0.71 [-1.81 to 0.4] |
| Eastern Sub-Saharan Africa | 21.01 [7.04-57.2] | 19.07 [6.29-52.83] | 30.25 [11.29-86.3] | 12.29 [4.57-35.11] | -1.57 [-1.62 to -1.52] |
| High-income Asia Pacific | 126.9 [113.13-142.53] | 36.89 [32.77-41.5] | 151.55 [121.36-172.21] | 15.85 [13.31-17.71] | -3.01 [-3.14 to -2.88] |
| High-income North America | 85.58 [78.2-90.57] | 14.06 [12.94-14.84] | 164.99 [143.54-177.79] | 13.19 [11.65-14.14] | -0.17 [-0.38 to 0.04] |
| North Africa and Middle East | 63.1 [37.55-111.98] | 25.92 [15.2-46.7] | 83.3 [62.24-111.68] | 12.64 [9.43-16.97] | -2.4 [-2.54 to -2.25] |
| Oceania | 1.87 [1.18-2.84] | 49.02 [31.03-74.74] | 3.39 [2.17-5.18] | 33.61 [21.62-51.34] | -1.28 [-1.33 to -1.23] |
| South Asia | 246.22 [137.18-429.58] | 28.1 [15.3-50.38] | 446.77 [307.56-638.86] | 18.78 [12.79-27.1] | -1.38 [-1.45 to -1.31] |
| Southeast Asia | 146.39 [107.74-223.97] | 39.54 [28.82-61.62] | 256.17 [200.22-379.86] | 25.42 [19.67-38.29] | -1.52 [-1.62 to -1.43] |
| Southern Latin America | 29.01 [24.9-33.28] | 37.01 [31.71-42.48] | 26.5 [23.05-29.92] | 16.94 [14.79-19.12] | -2.38 [-2.65 to -2.11] |
| Southern Sub-Saharan Africa | 2.97 [2.27-4.35] | 7.17 [5.48-10.45] | 7.45 [5.94-9.83] | 8.33 [6.64-10.93] | 0.7 [0.28 to 1.13] |
| Tropical Latin America | 32.95 [30.74-35.11] | 22.17 [20.56-23.67] | 91.41 [82.64-98.1] | 20.69 [18.72-22.19] | -0.14 [-0.41 to 0.14] |
| Western Europe | 153.19 [139.97-164.02] | 14.75 [13.52-15.76] | 193.32 [164.58-211] | 9.91 [8.67-10.72] | -1.09 [-1.31 to -0.87] |
| Western Sub-Saharan Africa | 17.29 [7.94-40.3] | 12.84 [5.91-29.79] | 26 [12.97-60.97] | 8.86 [4.46-20.74] | -1.39 [-1.49 to -1.28] |
| National |  |  |  |  |  |
| Afghanistan | 4.63 [1.41-10.31] | 44.29 [13.01-101.83] | 3.33 [1.37-6.54] | 28.81 [11.72-57.34] | -1.66 [-1.93 to -1.38] |
| Albania | 0.54 [0.37-0.81] | 17.26 [11.83-25.6] | 0.88 [0.52-1.34] | 11.27 [6.58-17.1] | -1.16 [-1.43 to -0.89] |
| Algeria | 2.98 [1.39-6.09] | 19.45 [9.44-38.22] | 5.73 [3.1-9.76] | 11.65 [6.21-19.87] | -1.41 [-1.52 to -1.29] |
| American Samoa | 0.01 [0.01-0.01] | 27.02 [17.93-39.82] | 0.02 [0.01-0.02] | 22.62 [14.87-33.36] | -0.61 [-0.73 to -0.48] |
| Andorra | 0.01 [0.01-0.02] | 12.84 [7.16-21.17] | 0.02 [0.01-0.03] | 7.68 [4.45-11.78] | -1.33 [-1.53 to -1.14] |
| Angola | 0.88 [0.35-2.02] | 16.26 [6.4-38.08] | 1.96 [0.9-3.94] | 11.83 [5.39-23.92] | -1.36 [-1.48 to -1.24] |
| Antigua and Barbuda | 0.03 [0.02-0.03] | 26.53 [22.38-31.24] | 0.03 [0.03-0.04] | 17.46 [14.71-20.53] | -1.47 [-1.74 to -1.2] |
| Argentina | 23.27 [19.39-27.39] | 42.28 [35.17-49.8] | 16.39 [13.75-19.26] | 16.54 [13.9-19.45] | -2.91 [-3.34 to -2.48] |
| Armenia | 0.9 [0.76-1.02] | 20.8 [17.76-23.89] | 0.81 [0.7-0.91] | 10.27 [8.94-11.6] | -2.25 [-2.79 to -1.7] |
| Australia | 5.97 [5.08-6.91] | 17.65 [14.99-20.43] | 9.17 [7.44-10.75] | 10.12 [8.3-11.85] | -1.78 [-1.92 to -1.64] |
| Austria | 2.93 [2.48-3.39] | 13.59 [11.51-15.73] | 3.79 [3.06-4.47] | 10.05 [8.2-11.84] | -0.81 [-0.95 to -0.68] |
| Azerbaijan | 0.54 [0.35-0.82] | 6.57 [4.26-10.09] | 0.81 [0.52-1.18] | 5.07 [3.27-7.43] | -0.9 [-1.27 to -0.52] |
| Bahamas | 0.04 [0.03-0.05] | 15.45 [12.59-19.21] | 0.08 [0.06-0.1] | 11.82 [9.23-15.04] | -1 [-1.16 to -0.84] |
| Bahrain | 0.05 [0.03-0.07] | 22.98 [15.85-33.42] | 0.09 [0.06-0.13] | 9.46 [6.19-13.48] | -3.7 [-4.02 to -3.38] |
| Bangladesh | 38.62 [16.76-79.38] | 53.84 [23.16-111.79] | 70.52 [36.25-130.47] | 32.05 [16.5-59.29] | -1.63 [-1.99 to -1.28] |
| Barbados | 0.12 [0.1-0.14] | 23.07 [19.28-27.17] | 0.18 [0.14-0.23] | 19.3 [14.72-24.4] | -0.54 [-0.77 to -0.31] |
| Belarus | 3.64 [2.68-4.76] | 16.04 [11.77-20.99] | 4.53 [3.58-5.58] | 15.3 [12.07-18.9] | -0.55 [-0.76 to -0.33] |
| Belgium | 2.9 [2.45-3.35] | 10.38 [8.8-12.01] | 4.78 [3.82-5.6] | 10.02 [8.21-11.67] | 0.16 [-0.26 to 0.57] |
| Belize | 0.02 [0.02-0.03] | 14.08 [11.53-16.84] | 0.05 [0.04-0.06] | 10.54 [8.58-12.7] | -1.29 [-1.57 to -1.01] |
| Benin | 0.47 [0.18-1.12] | 15.07 [5.84-36.11] | 0.85 [0.34-2.05] | 11.07 [4.5-26.79] | -0.95 [-1.04 to -0.86] |
| Bermuda | 0.02 [0.01-0.02] | 17.47 [14.05-21.5] | 0.02 [0.02-0.03] | 9.54 [7.5-12.05] | -2.35 [-2.55 to -2.15] |
| Bhutan | 0.1 [0.05-0.19] | 27.75 [12.38-54.1] | 0.16 [0.09-0.26] | 16.08 [9.22-26.81] | -1.82 [-1.89 to -1.75] |
| Bolivia (Plurinational State of) | 3.01 [1.86-4.84] | 60.22 [36.79-98.15] | 5.98 [3.7-9.28] | 40.65 [25.11-63.18] | -1.25 [-1.3 to -1.2] |
| Bosnia and Herzegovina | 2.07 [1.32-3.2] | 30.76 [19.26-48.7] | 1.58 [1.03-2.24] | 13.91 [9.07-19.69] | -3.04 [-3.32 to -2.76] |
| Botswana | 0.09 [0.05-0.16] | 11.45 [6.49-20.61] | 0.12 [0.07-0.21] | 5.89 [3.49-10.16] | -2.03 [-2.24 to -1.83] |
| Brazil | 32.05 [29.87-34.22] | 22.06 [20.44-23.61] | 89.29 [80.64-95.92] | 20.66 [18.68-22.19] | -0.14 [-0.42 to 0.15] |
| Brunei Darussalam | 0.08 [0.05-0.12] | 56.72 [36.99-84.17] | 0.14 [0.1-0.2] | 27.96 [19.08-39.16] | -2.41 [-2.61 to -2.21] |
| Bulgaria | 3.05 [2.63-3.51] | 14.96 [12.9-17.2] | 5.55 [4.72-6.45] | 21.34 [18.07-24.93] | 1.3 [1.08 to 1.52] |
| Burkina Faso | 0.69 [0.18-2.07] | 10.54 [2.76-31.57] | 1.25 [0.39-3.37] | 9.05 [2.83-24.39] | -0.19 [-0.3 to -0.08] |
| Burundi | 0.95 [0.27-2.51] | 26.57 [7.42-70.95] | 1.13 [0.22-4.24] | 16.13 [3.12-61.07] | -1.99 [-2.21 to -1.77] |
| Cabo Verde | 0.03 [0.01-0.09] | 7.4 [2.51-22.79] | 0.05 [0.02-0.11] | 6.36 [2.82-14.69] | -0.72 [-0.97 to -0.47] |
| Cambodia | 2.73 [1.54-4.76] | 42.74 [23.74-77.34] | 4.79 [2.87-8.41] | 26.61 [15.79-48.9] | -1.69 [-1.81 to -1.57] |
| Cameroon | 0.87 [0.37-1.78] | 13.01 [5.53-27.12] | 2.02 [0.8-4.6] | 10.91 [4.38-24.99] | -0.61 [-0.8 to -0.42] |
| Canada | 8.84 [7.56-10.18] | 15.68 [13.42-18.06] | 14.17 [11.56-16.64] | 9.88 [8.12-11.59] | -1.56 [-1.75 to -1.38] |
| Central African Republic | 0.35 [0.13-0.82] | 21.38 [7.44-50.7] | 0.58 [0.17-1.46] | 19.07 [5.55-49.5] | -0.37 [-0.41 to -0.34] |
| Chad | 0.61 [0.19-1.74] | 13.48 [4.28-38.65] | 1.18 [0.4-3] | 13.69 [4.65-34.98] | -0.02 [-0.21 to 0.17] |
| Chile | 3.08 [2.67-3.56] | 18.62 [16.11-21.53] | 7.28 [6.15-8.47] | 15.65 [13.26-18.18] | -0.2 [-0.6 to 0.19] |
| China | 1522.5 [689.96-2032.94] | 133.94 [59.99-179.18] | 797.19 [556.58-1034.52] | 22.72 [15.85-29.47] | -6.76 [-7.47 to -6.06] |
| Colombia | 7.13 [6.2-8.13] | 25.82 [22.43-29.44] | 25.48 [20.28-30.94] | 26.25 [20.97-31.86] | 0.26 [-0.14 to 0.65] |
| Comoros | 0.05 [0.02-0.11] | 17.05 [6.68-37.37] | 0.08 [0.03-0.21] | 11.1 [3.99-27.86] | -1.6 [-1.81 to -1.4] |
| Congo | 0.25 [0.13-0.53] | 16.03 [7.71-33.4] | 0.43 [0.21-0.89] | 11.31 [5.47-23.5] | -1.4 [-1.52 to -1.27] |
| Cook Islands | 0.01 [0-0.01] | 29.82 [17.97-45.86] | 0 [0-0.01] | 10.26 [5.63-16.32] | -3.56 [-3.78 to -3.33] |
| Costa Rica | 0.43 [0.36-0.5] | 14.98 [12.5-17.57] | 1.43 [1.15-1.71] | 14.59 [11.79-17.46] | -0.13 [-0.34 to 0.08] |
| Croatia | 2.79 [2.44-3.18] | 26.7 [23.22-30.39] | 2.68 [2.26-3.12] | 15.72 [13.17-18.35] | -1.53 [-1.74 to -1.33] |
| Cuba | 2.62 [2.21-3.1] | 15.31 [12.9-18.07] | 4.09 [3.32-4.94] | 11.47 [9.32-13.88] | -1.18 [-1.44 to -0.92] |
| Cyprus | 0.45 [0.27-0.71] | 40 [23.94-64.1] | 0.4 [0.26-0.59] | 12.06 [7.76-17.68] | -4.03 [-4.31 to -3.76] |
| Czechia | 5.56 [4.76-6.42] | 22.93 [19.64-26.46] | 3.94 [3.33-4.56] | 9.82 [8.29-11.42] | -2.84 [-3.16 to -2.52] |
| Côte d'Ivoire | 0.64 [0.27-1.43] | 11.35 [4.74-25.28] | 1.5 [0.63-3.38] | 9.29 [3.98-20.88] | -0.54 [-0.72 to -0.36] |
| Democratic People's Republic of Korea | 12.71 [7.64-19.31] | 56.82 [34.06-86.56] | 18.67 [9.89-35.93] | 34.76 [18.35-66.91] | -1.69 [-1.76 to -1.62] |
| Democratic Republic of the Congo | 3.36 [1.18-8.63] | 14.95 [5.06-39.77] | 7.6 [2.23-24.98] | 14.72 [4.3-48.24] | -0.04 [-0.15 to 0.07] |
| Denmark | 2.9 [2.42-3.42] | 20.6 [17.23-24.24] | 2.94 [2.41-3.47] | 12.54 [10.34-14.8] | -1.58 [-1.8 to -1.35] |
| Djibouti | 0.03 [0.01-0.08] | 16.27 [6.3-41.24] | 0.11 [0.04-0.25] | 11.93 [4.51-28.19] | -1.13 [-1.25 to -1.01] |
| Dominica | 0.03 [0.02-0.04] | 25.98 [18.03-36.34] | 0.03 [0.02-0.04] | 18.44 [12.32-26.54] | -1.07 [-1.23 to -0.9] |
| Dominican Republic | 1.04 [0.67-1.62] | 18.12 [11.58-28.18] | 2.41 [1.52-3.61] | 14.39 [9.05-21.49] | -0.27 [-0.46 to -0.08] |
| Ecuador | 1.65 [1.36-1.95] | 19.5 [16.09-23.08] | 8.9 [6.85-11.38] | 32.34 [24.88-41.31] | 1.76 [1.51 to 2.01] |
| Egypt | 10.76 [5.16-20.87] | 31.69 [14.52-64.13] | 10.95 [6.2-18.15] | 13.64 [7.63-23.14] | -2.63 [-2.72 to -2.54] |
| El Salvador | 0.95 [0.65-1.47] | 19.51 [13.31-30.19] | 1.37 [0.9-2] | 12.66 [8.3-18.51] | -1.24 [-1.61 to -0.87] |
| Equatorial Guinea | 0.05 [0.02-0.12] | 18.42 [6.73-43.11] | 0.05 [0.02-0.09] | 6.58 [2.99-12.25] | -4.12 [-4.7 to -3.55] |
| Eritrea | 0.37 [0.11-0.92] | 23.83 [7.22-59.93] | 0.6 [0.21-1.4] | 15.64 [5.42-37.12] | -1.34 [-1.49 to -1.2] |
| Estonia | 0.49 [0.41-0.58] | 13.64 [11.4-16.2] | 0.58 [0.47-0.7] | 10.74 [8.74-12.88] | -1.52 [-2.28 to -0.76] |
| Eswatini | 0.05 [0.03-0.08] | 11.87 [6.92-20.42] | 0.08 [0.04-0.13] | 9.75 [5.54-16.41] | -0.2 [-0.62 to 0.21] |
| Ethiopia | 5.81 [1.49-16.35] | 20.27 [5.01-58.32] | 5.98 [1.87-18.87] | 9.39 [2.92-29.79] | -2.9 [-3.08 to -2.73] |
| Fiji | 0.18 [0.12-0.25] | 38.62 [26.42-55.08] | 0.32 [0.2-0.47] | 31.02 [19.61-45.85] | -0.98 [-1.16 to -0.8] |
| Finland | 2.98 [2.47-3.54] | 24.01 [19.98-28.51] | 3.5 [2.85-4.11] | 14.11 [11.67-16.48] | -1.85 [-1.95 to -1.74] |
| France | 18.32 [15.45-21.18] | 11.69 [9.88-13.51] | 26.15 [21.09-30.81] | 8.58 [7.03-10.09] | -0.58 [-1.02 to -0.13] |
| Gabon | 0.11 [0.05-0.22] | 11.61 [5.69-23.77] | 0.13 [0.07-0.24] | 8.43 [4.44-15.41] | -1.1 [-1.21 to -0.98] |
| Gambia | 0.06 [0.02-0.14] | 11.63 [4.76-27.46] | 0.17 [0.07-0.43] | 11.84 [4.68-29.35] | -0.02 [-0.16 to 0.12] |
| Georgia | 2.67 [2.12-3.31] | 25.22 [19.98-31.35] | 4.47 [3.63-5.34] | 39.5 [32.23-47.2] | 3.17 [2.05 to 4.3] |
| Germany | 33.43 [27.08-40.61] | 14.57 [11.81-17.66] | 35.66 [28.57-41.96] | 9.21 [7.5-10.79] | -1.6 [-1.85 to -1.36] |
| Ghana | 1.32 [0.55-3.18] | 13.96 [5.83-33.56] | 2.97 [1.44-6.07] | 11.84 [5.78-23.98] | -0.17 [-0.44 to 0.1] |
| Greece | 4 [2.97-4.95] | 14.87 [11.08-18.39] | 6.17 [5.04-7.2] | 12.32 [10.22-14.33] | -0.72 [-1.01 to -0.43] |
| Greenland | 0.04 [0.02-0.05] | 74.35 [49.2-102.09] | 0.03 [0.02-0.05] | 29.76 [18.68-42.44] | -3.16 [-3.3 to -3.02] |
| Grenada | 0.04 [0.03-0.05] | 28.71 [22.06-35.43] | 0.04 [0.03-0.04] | 19.28 [15.87-23.09] | -1.27 [-1.41 to -1.13] |
| Guam | 0.02 [0.02-0.03] | 26.07 [16.65-36.36] | 0.03 [0.02-0.05] | 8.7 [6.02-11.86] | -3.31 [-3.69 to -2.93] |
| Guatemala | 0.32 [0.26-0.4] | 6.61 [5.23-8.2] | 1.63 [1.29-2] | 9.14 [7.26-11.22] | 0.84 [0.56 to 1.12] |
| Guinea | 0.67 [0.26-1.6] | 12.67 [4.85-30.35] | 1.03 [0.39-2.49] | 11.87 [4.51-28.95] | 0.05 [-0.09 to 0.19] |
| Guinea-Bissau | 0.12 [0.04-0.28] | 19.7 [6.99-46.28] | 0.17 [0.07-0.42] | 16.58 [6.38-40.17] | -0.37 [-0.46 to -0.28] |
| Guyana | 0.17 [0.14-0.2] | 27.97 [23.63-32.97] | 0.21 [0.16-0.28] | 19.9 [14.8-26.01] | -0.9 [-1.1 to -0.7] |
| Haiti | 2.95 [1.42-5.36] | 59.48 [28.16-112.03] | 5.12 [2.24-9.22] | 47.74 [20.57-87.57] | -0.58 [-0.65 to -0.52] |
| Honduras | 0.96 [0.51-1.69] | 30.21 [15.97-53.6] | 5.12 [3.2-7.57] | 51.44 [32.05-76.13] | 2.04 [1.79 to 2.3] |
| Hungary | 3.16 [2.82-3.53] | 12.4 [11.03-13.84] | 2.95 [2.45-3.45] | 8.54 [7.1-10.01] | -1.11 [-1.42 to -0.79] |
| Iceland | 0.08 [0.07-0.09] | 15.55 [12.92-18.18] | 0.11 [0.08-0.13] | 8.93 [7.06-10.73] | -1.51 [-1.88 to -1.15] |
| India | 179.86 [100.62-309.63] | 25.1 [13.72-44.45] | 328.75 [226.79-467.46] | 16.88 [11.54-24.21] | -1.35 [-1.45 to -1.25] |
| Indonesia | 49.09 [33.33-83.86] | 34.83 [23.15-62.46] | 94.95 [64.46-160.6] | 27.54 [18.23-49.75] | -0.7 [-0.82 to -0.58] |
| Iran (Islamic Republic of) | 5.7 [3.37-8.97] | 16.61 [9.19-26.56] | 7.72 [5.3-9.78] | 6.49 [4.42-8.22] | -3.2 [-3.35 to -3.05] |
| Iraq | 2.05 [1.25-3.55] | 16.4 [10-28.51] | 3.31 [2.01-4.9] | 9.83 [5.98-14.51] | -2.41 [-2.67 to -2.16] |
| Ireland | 1.83 [1.59-2.08] | 26.05 [22.54-29.66] | 1.83 [1.48-2.16] | 12.07 [9.83-14.23] | -2.17 [-2.36 to -1.98] |
| Israel | 0.58 [0.48-0.68] | 7.03 [5.88-8.28] | 1.46 [1.18-1.73] | 6.1 [4.97-7.22] | -0.38 [-0.77 to 0] |
| Italy | 16.46 [14.99-17.6] | 10.49 [9.55-11.21] | 27.04 [22.27-29.99] | 8.37 [7.14-9.19] | -0.22 [-0.59 to 0.15] |
| Jamaica | 0.69 [0.55-0.84] | 22.71 [18.15-27.68] | 1.07 [0.8-1.38] | 19.44 [14.49-25.03] | -0.18 [-0.52 to 0.16] |
| Japan | 97.8 [89.66-103.2] | 33.06 [30.25-34.93] | 126.24 [100.57-142.2] | 16.82 [14.31-18.42] | -2.57 [-2.74 to -2.39] |
| Jordan | 0.07 [0.04-0.12] | 3.82 [2.31-6.71] | 0.21 [0.14-0.31] | 2.11 [1.33-3.06] | -2.16 [-2.36 to -1.95] |
| Kazakhstan | 5.07 [3.95-6.6] | 25.53 [19.8-33.41] | 8.18 [6.99-9.51] | 29.9 [25.62-34.62] | 0.35 [0.14 to 0.56] |
| Kenya | 1.2 [0.46-3.25] | 9.91 [3.82-27.17] | 2.95 [1.31-7.21] | 8.99 [4.01-21.96] | -0.04 [-0.2 to 0.12] |
| Kiribati | 0.02 [0.01-0.03] | 31.24 [18.65-50.7] | 0.03 [0.02-0.05] | 29.44 [17.87-48] | -0.19 [-0.24 to -0.13] |
| Kuwait | 0.06 [0.05-0.07] | 7.12 [5.72-8.66] | 0.08 [0.06-0.1] | 2.08 [1.58-2.64] | -4.4 [-5.31 to -3.49] |
| Kyrgyzstan | 1.28 [1.06-1.56] | 25.89 [21.52-31.58] | 1.95 [1.56-2.36] | 25.73 [20.7-31.09] | 0.08 [-0.28 to 0.44] |
| Lao People's Democratic Republic | 1.58 [0.82-2.79] | 51.3 [26.15-94.59] | 1.56 [0.94-2.64] | 23.01 [13.75-40.33] | -2.79 [-2.88 to -2.71] |
| Latvia | 1.11 [0.95-1.29] | 17.76 [15.14-20.7] | 1.06 [0.88-1.25] | 13.62 [11.29-16.18] | -1.49 [-2.06 to -0.91] |
| Lebanon | 1.16 [0.68-1.96] | 34.97 [20.57-59.42] | 1.05 [0.69-1.54] | 9.06 [5.93-13.3] | -4.86 [-5.15 to -4.58] |
| Lesotho | 0.16 [0.07-0.32] | 12.37 [5.33-24.49] | 0.25 [0.13-0.45] | 15.05 [8.02-27.38] | 1.38 [1 to 1.76] |
| Liberia | 0.22 [0.08-0.53] | 12.11 [4.64-29.71] | 0.34 [0.1-1.09] | 11.34 [3.46-36.29] | -0.51 [-0.7 to -0.32] |
| Libya | 0.28 [0.15-0.54] | 9.64 [5.09-18.97] | 0.62 [0.33-1.08] | 8.27 [4.44-14.49] | -0.36 [-0.6 to -0.12] |
| Lithuania | 0.95 [0.79-1.13] | 11.86 [9.86-14.15] | 1.44 [1.18-1.71] | 12.59 [10.29-15.06] | -0.23 [-0.96 to 0.51] |
| Luxembourg | 0.13 [0.11-0.15] | 13.32 [11.39-15.47] | 0.15 [0.12-0.18] | 7.24 [5.91-8.61] | -1.84 [-2.19 to -1.5] |
| Madagascar | 2.07 [0.67-5.45] | 26.77 [8.47-71.27] | 3.36 [1.07-9.57] | 21.09 [6.66-60.77] | -0.75 [-0.8 to -0.69] |
| Malawi | 0.93 [0.29-2.55] | 16.38 [5.07-45.81] | 1.56 [0.47-4.81] | 14.45 [4.41-44.49] | -0.6 [-0.76 to -0.43] |
| Malaysia | 3.77 [2.53-5.5] | 27 [18.05-39.51] | 6.88 [4.48-9.91] | 15.65 [10.16-22.72] | -1.69 [-1.81 to -1.57] |
| Maldives | 0.04 [0.03-0.07] | 35.88 [22.45-58.7] | 0.06 [0.04-0.08] | 12.04 [7.95-17.17] | -3.85 [-3.99 to -3.71] |
| Mali | 0.77 [0.28-1.83] | 12.87 [4.61-30.99] | 1.27 [0.51-2.91] | 9.7 [3.82-22.31] | -0.74 [-0.87 to -0.62] |
| Malta | 0.06 [0.05-0.07] | 8.33 [6.97-9.74] | 0.09 [0.07-0.11] | 4.66 [3.75-5.63] | -1.74 [-2.08 to -1.39] |
| Marshall Islands | 0.01 [0.01-0.02] | 62.15 [34.23-106.97] | 0.02 [0.01-0.03] | 42.41 [23.47-70.56] | -1.32 [-1.38 to -1.27] |
| Mauritania | 0.21 [0.09-0.47] | 13.41 [5.65-29.77] | 0.31 [0.12-0.73] | 9.11 [3.65-21.38] | -1.3 [-1.42 to -1.17] |
| Mauritius | 0.38 [0.32-0.43] | 33.59 [28.86-38.81] | 0.71 [0.6-0.83] | 22.3 [18.77-26.06] | -1.88 [-2.28 to -1.47] |
| Mexico | 7.39 [6.99-7.78] | 11.3 [10.66-11.91] | 34.15 [29.93-38.39] | 16.24 [14.24-18.25] | 1.4 [1.14 to 1.65] |
| Micronesia (Federated States of) | 0.04 [0.02-0.07] | 62.53 [34.38-105.02] | 0.04 [0.02-0.07] | 41.73 [23.4-68.45] | -1.38 [-1.51 to -1.24] |
| Monaco | 0.02 [0.01-0.04] | 17.77 [10.89-27.99] | 0.01 [0.01-0.02] | 6.93 [4.21-10.7] | -3.08 [-3.25 to -2.9] |
| Mongolia | 0.94 [0.56-1.59] | 58.88 [35.03-101.02] | 1.81 [1.23-2.5] | 57.12 [38.36-79.32] | -0.14 [-0.39 to 0.12] |
| Montenegro | 0.1 [0.07-0.14] | 9.38 [6.61-12.79] | 0.16 [0.1-0.23] | 9.79 [6.1-14.03] | -0.09 [-0.35 to 0.17] |
| Morocco | 4.68 [1.67-10.86] | 21.2 [7.53-49.42] | 8.27 [4.33-14.16] | 15.35 [8.08-26.34] | -0.83 [-0.92 to -0.75] |
| Mozambique | 2.03 [0.54-6.54] | 22.46 [5.87-72.94] | 3.75 [1.11-11.32] | 22.28 [6.57-66.91] | 0.35 [0.19 to 0.5] |
| Myanmar | 16.57 [9.27-29.33] | 46.97 [25.72-85.92] | 18.08 [10.97-31.41] | 23.58 [14.17-41.97] | -2.64 [-2.81 to -2.48] |
| Namibia | 0.1 [0.06-0.18] | 11.01 [6.37-19.12] | 0.17 [0.1-0.3] | 8.7 [5.09-14.78] | -0.97 [-1.22 to -0.72] |
| Nauru | 0 [0-0] | 47.91 [26.97-82.76] | 0 [0-0.01] | 42.08 [23.11-67.37] | -0.51 [-0.93 to -0.09] |
| Nepal | 4.51 [2.06-9.57] | 31.82 [14.24-69.85] | 7.44 [3.82-13.41] | 19.91 [10.14-36.19] | -1.46 [-1.73 to -1.18] |
| Netherlands | 6.03 [5.11-6.99] | 17.08 [14.5-19.78] | 7.06 [5.77-8.26] | 10.21 [8.41-11.91] | -1.92 [-2.18 to -1.66] |
| New Zealand | 1.49 [1.27-1.7] | 21.96 [18.81-25.1] | 1.95 [1.63-2.28] | 12.34 [10.37-14.35] | -2.12 [-2.38 to -1.85] |
| Nicaragua | 0.36 [0.25-0.51] | 14.93 [10.44-21.45] | 0.87 [0.57-1.23] | 11.01 [7.26-15.61] | -0.62 [-0.84 to -0.4] |
| Niger | 0.58 [0.18-1.46] | 14.7 [4.53-37.35] | 1.53 [0.47-4.06] | 12.61 [3.86-33.73] | -0.39 [-0.44 to -0.35] |
| Nigeria | 8.81 [3.86-20.86] | 12.86 [5.69-30.16] | 8.7 [4.15-20.15] | 6.43 [3.12-14.86] | -2.88 [-3.14 to -2.61] |
| Niue | 0 [0-0] | 41.19 [25.03-63.07] | 0 [0-0] | 24.2 [14.87-36.79] | -1.99 [-2.14 to -1.85] |
| North Macedonia | 1.17 [0.85-1.67] | 38.08 [27.46-54.34] | 1.8 [1.26-2.48] | 34.71 [24.15-48.12] | -0.42 [-0.82 to -0.02] |
| Northern Mariana Islands | 0.01 [0-0.01] | 41.37 [26.97-62.39] | 0.02 [0.01-0.03] | 29.06 [19.14-41.95] | -1.26 [-1.42 to -1.11] |
| Norway | 2.78 [2.51-3] | 22.21 [20.16-23.84] | 2.04 [1.73-2.25] | 9.98 [8.63-10.96] | -2.44 [-2.77 to -2.11] |
| Oman | 0.16 [0.09-0.28] | 17.41 [9.53-30.48] | 0.18 [0.1-0.27] | 7.43 [4.19-11.44] | -2.66 [-2.86 to -2.47] |
| Pakistan | 23.13 [12.63-42.8] | 26.48 [14.26-49.7] | 39.91 [24.74-66.15] | 21.73 [13.41-36.53] | -1 [-1.26 to -0.74] |
| Palau | 0 [0-0.01] | 31.85 [19.23-49.84] | 0.01 [0-0.01] | 22.24 [14.05-33.61] | -0.94 [-1.08 to -0.79] |
| Palestine | 0.1 [0.06-0.18] | 8 [4.88-13.43] | 0.15 [0.1-0.22] | 4.44 [2.95-6.29] | -1.89 [-2.22 to -1.55] |
| Panama | 0.49 [0.4-0.58] | 20.46 [16.77-24.19] | 1.63 [1.21-2.03] | 20.94 [15.65-26.22] | 0.1 [-0.11 to 0.31] |
| Papua New Guinea | 1.22 [0.68-2.01] | 53.4 [29.43-89.5] | 2.36 [1.32-3.92] | 36.26 [20.21-60.55] | -1.28 [-1.32 to -1.24] |
| Paraguay | 0.91 [0.64-1.26] | 25.16 [17.75-35.02] | 2.12 [1.39-3.05] | 21.66 [14.24-31.11] | 0.02 [-0.18 to 0.21] |
| Peru | 4.84 [3.14-7.45] | 25.15 [16.31-38.74] | 8.83 [5.6-13.41] | 15.59 [9.9-23.66] | -1.83 [-2.21 to -1.45] |
| Philippines | 6.31 [4.9-9.87] | 15.31 [11.59-24.93] | 20.71 [16.22-28.02] | 16.29 [12.73-22.67] | 0.55 [0.4 to 0.7] |
| Poland | 12.28 [11.58-12.92] | 16.06 [15.13-16.9] | 12.65 [11.21-13.99] | 9.81 [8.73-10.85] | -1.83 [-2.21 to -1.45] |
| Portugal | 5.14 [4.48-5.86] | 21.53 [18.65-24.53] | 6.9 [5.61-8.1] | 13.34 [11-15.58] | -1.04 [-1.31 to -0.78] |
| Puerto Rico | 0.72 [0.61-0.85] | 11.79 [9.91-13.86] | 1.12 [0.87-1.38] | 8.02 [6.25-9.96] | -1.79 [-2.09 to -1.48] |
| Qatar | 0.05 [0.03-0.08] | 46.38 [26.2-80.34] | 0.12 [0.07-0.19] | 15.53 [9.16-24.65] | -4.06 [-4.69 to -3.44] |
| Republic of Korea | 28.34 [19.45-42.08] | 66.96 [45.43-101.72] | 24.32 [17.05-32.99] | 14.32 [10.04-19.41] | -4.91 [-5.11 to -4.72] |
| Republic of Moldova | 0.82 [0.68-0.98] | 12.02 [9.97-14.33] | 0.99 [0.82-1.18] | 9.24 [7.69-11.02] | -1.3 [-1.94 to -0.66] |
| Romania | 10.39 [8.38-12.72] | 22.41 [18.03-27.38] | 15.73 [12.9-18.59] | 22.65 [18.45-26.93] | 0.01 [-0.51 to 0.54] |
| Russian Federation | 59.48 [56.73-61.79] | 19.87 [18.85-20.69] | 106.12 [95.11-115.44] | 24.43 [21.93-26.57] | -0.16 [-1.65 to 1.36] |
| Rwanda | 1.16 [0.38-2.53] | 27.35 [8.81-61.2] | 1.11 [0.38-2.85] | 12.06 [4.1-30.72] | -3.48 [-3.81 to -3.15] |
| Saint Kitts and Nevis | 0.02 [0.02-0.02] | 30.51 [23.94-37.05] | 0.02 [0.02-0.03] | 18.35 [14.65-22.3] | -1.76 [-2 to -1.52] |
| Saint Lucia | 0.04 [0.03-0.05] | 27.31 [22.5-32.64] | 0.06 [0.05-0.08] | 14.58 [11.46-18.26] | -2.73 [-3.02 to -2.43] |
| Saint Vincent and the Grenadines | 0.02 [0.02-0.02] | 16.3 [13.42-19.39] | 0.03 [0.02-0.04] | 11.79 [9.67-14.22] | -1.07 [-1.27 to -0.88] |
| Samoa | 0.06 [0.03-0.08] | 44.77 [26.93-68.26] | 0.07 [0.04-0.11] | 30.58 [18.34-48.23] | -1.32 [-1.53 to -1.1] |
| San Marino | 0 [0-0.01] | 7.58 [5-11.02] | 0 [0-0.01] | 2.82 [1.48-4.6] | -2.55 [-2.87 to -2.24] |
| Sao Tome and Principe | 0.01 [0-0.03] | 9.56 [3.81-23.47] | 0.02 [0.01-0.04] | 9.17 [3.76-22.25] | -0.24 [-0.41 to -0.08] |
| Saudi Arabia | 0.7 [0.41-1.26] | 8.64 [5.09-15.72] | 1.2 [0.73-1.84] | 5.16 [3.09-7.88] | -1.52 [-1.72 to -1.32] |
| Senegal | 0.61 [0.25-1.43] | 12.22 [5.05-28.67] | 1.31 [0.54-3.07] | 10.87 [4.51-25.55] | -0.26 [-0.36 to -0.16] |
| Serbia | 6.75 [4.67-9.52] | 37.59 [26.15-53.03] | 6.33 [4.49-8.79] | 21.09 [14.98-29.24] | -2.48 [-2.8 to -2.15] |
| Seychelles | 0.02 [0.01-0.03] | 16.66 [9.75-27.73] | 0.01 [0.01-0.03] | 7.79 [4.14-13.65] | -1.92 [-2.16 to -1.68] |
| Sierra Leone | 0.38 [0.13-1.01] | 11.87 [4.1-31.77] | 0.63 [0.22-1.86] | 11.04 [3.89-32.92] | 0.01 [-0.19 to 0.2] |
| Singapore | 0.68 [0.58-0.78] | 19.22 [16.58-22.21] | 0.84 [0.68-1] | 5.63 [4.58-6.69] | -4.22 [-4.46 to -3.98] |
| Slovakia | 1.64 [1.19-2.2] | 15.72 [11.41-21.06] | 1.49 [1.02-2.07] | 8.78 [6.01-12.21] | -1.81 [-1.88 to -1.74] |
| Slovenia | 0.58 [0.49-0.67] | 13.26 [11.17-15.46] | 0.57 [0.45-0.7] | 6.4 [5.09-7.81] | -2.36 [-2.67 to -2.05] |
| Solomon Islands | 0.1 [0.05-0.18] | 60.31 [32.34-103.11] | 0.21 [0.12-0.34] | 47.11 [26.73-77.42] | -0.75 [-0.89 to -0.62] |
| Somalia | 0.86 [0.17-2.92] | 27.47 [5.08-95.89] | 1.66 [0.26-6.27] | 20 [3.05-77.6] | -0.98 [-1.05 to -0.91] |
| South Africa | 1.5 [1.16-2.01] | 4.69 [3.62-6.27] | 4.39 [3.36-5.3] | 6.08 [4.63-7.33] | 0.82 [0.38 to 1.26] |
| South Sudan | 0.67 [0.27-1.52] | 16.84 [6.73-38.46] | 0.74 [0.25-1.93] | 13.5 [4.55-36.16] | -0.99 [-1.34 to -0.65] |
| Spain | 9.15 [7.79-10.48] | 9.33 [7.93-10.69] | 22.12 [17.62-26.03] | 10.1 [8.19-11.84] | 0.64 [0.17 to 1.11] |
| Sri Lanka | 2.43 [1.66-3.47] | 16.01 [10.92-22.85] | 4 [2.37-6.06] | 9.05 [5.35-13.69] | -1.34 [-1.57 to -1.11] |
| Sudan | 3.95 [1.27-8.39] | 29.04 [9.18-62.86] | 4.21 [1.9-8.2] | 15.27 [6.89-30.02] | -2.28 [-2.37 to -2.19] |
| Suriname | 0.09 [0.06-0.12] | 21.26 [14.7-29.99] | 0.18 [0.11-0.26] | 16.36 [10.41-23.98] | -0.76 [-0.97 to -0.56] |
| Sweden | 5 [4.31-5.7] | 18.33 [15.86-20.85] | 3.78 [3.04-4.49] | 8.48 [6.9-10.06] | -2.28 [-2.62 to -1.95] |
| Switzerland | 2.57 [2.11-3.05] | 13.4 [11.09-15.89] | 3.04 [2.38-3.63] | 7.73 [6.16-9.2] | -1.5 [-1.67 to -1.34] |
| Syrian Arab Republic | 1.22 [0.68-2.59] | 15.84 [8.72-34.11] | 1.92 [1.13-3.07] | 10.1 [5.95-16.23] | -1.98 [-2.3 to -1.66] |
| Taiwan (Province of China) | 3.96 [3.47-4.5] | 16.16 [14.04-18.39] | 7.63 [6.28-9.02] | 9.72 [8.04-11.48] | -2.55 [-3.01 to -2.1] |
| Tajikistan | 0.86 [0.52-1.56] | 19.56 [11.81-35.59] | 1.37 [0.89-1.96] | 17.23 [11.11-24.59] | -0.89 [-1.51 to -0.26] |
| Thailand | 38.14 [24.48-56.17] | 75.76 [48.27-112.02] | 67.49 [44.3-97.6] | 34.36 [22.62-49.68] | -3.03 [-3.26 to -2.8] |
| Timor-Leste | 0.13 [0.07-0.23] | 35.15 [18.29-67.14] | 0.36 [0.17-0.7] | 27.02 [13.08-54.52] | -0.73 [-0.9 to -0.56] |
| Togo | 0.23 [0.09-0.6] | 12.7 [4.69-33.02] | 0.69 [0.26-1.79] | 12.35 [4.6-31.75] | 0.02 [-0.12 to 0.15] |
| Tokelau | 0 [0-0] | 55.46 [29.84-94.96] | 0 [0-0] | 25.96 [15.41-41.31] | -2.59 [-2.64 to -2.53] |
| Tonga | 0.02 [0.01-0.03] | 21.04 [12.42-35.97] | 0.02 [0.01-0.03] | 15.39 [8.89-25.38] | -0.77 [-0.87 to -0.67] |
| Trinidad and Tobago | 0.34 [0.29-0.4] | 25.5 [21.43-29.97] | 0.61 [0.46-0.81] | 17.75 [13.22-23.33] | -1.39 [-1.57 to -1.22] |
| Tunisia | 1.27 [0.59-2.41] | 17.49 [8.09-33.59] | 2.12 [1.03-3.79] | 9.84 [4.78-17.54] | -1.95 [-2 to -1.9] |
| Turkmenistan | 0.66 [0.54-0.89] | 21.66 [17.48-29.09] | 2.23 [1.62-3.21] | 34.58 [25.2-49.5] | 1.63 [1.26 to 2.01] |
| Tuvalu | 0.01 [0-0.01] | 70.34 [36.27-121.59] | 0.01 [0-0.01] | 37.34 [21.28-60.85] | -2.01 [-2.13 to -1.88] |
| Uganda | 1.62 [0.44-4.74] | 16.98 [4.59-49.91] | 2.1 [0.72-5.68] | 9.84 [3.38-26.3] | -2.26 [-2.45 to -2.08] |
| Ukraine | 38.45 [30.71-47.29] | 32.57 [25.93-40.12] | 29.65 [21.67-38.98] | 20.76 [15.14-27.37] | -1.75 [-1.93 to -1.57] |
| United Arab Emirates | 0.14 [0.08-0.28] | 30.89 [16.65-62.56] | 0.49 [0.3-0.74] | 18.72 [11.34-28.06] | 0.11 [-0.46 to 0.69] |
| United Kingdom | 35.29 [33.23-36.66] | 22.31 [21.1-23.16] | 34.08 [29.88-36.63] | 13 [11.62-13.88] | -1.64 [-1.83 to -1.44] |
| United Republic of Tanzania | 2.43 [0.71-6.78] | 14.99 [4.27-42.62] | 3.59 [1.23-10.52] | 9.61 [3.27-28.26] | -1.57 [-1.64 to -1.5] |
| United States of America | 76.71 [69.95-81.29] | 13.9 [12.78-14.69] | 150.78 [131.18-162.77] | 13.59 [12-14.6] | -0.02 [-0.24 to 0.19] |
| United States Virgin Islands | 0.03 [0.02-0.05] | 23.55 [15.17-35.46] | 0.03 [0.02-0.05] | 9.66 [6.11-14.4] | -2.68 [-2.87 to -2.48] |
| Uruguay | 2.66 [2.26-3.09] | 38.91 [33.1-45.17] | 2.83 [2.37-3.27] | 27.23 [23.02-31.54] | -1.34 [-1.48 to -1.21] |
| Uzbekistan | 1.56 [1.24-1.96] | 8.14 [6.47-10.26] | 8.43 [6.74-10.58] | 21.79 [17.54-27.11] | 2.64 [1.53 to 3.76] |
| Vanuatu | 0.04 [0.02-0.06] | 45.91 [24.8-73.98] | 0.08 [0.04-0.13] | 33.67 [17.79-55.7] | -1.16 [-1.26 to -1.07] |
| Venezuela (Bolivarian Republic of) | 2.82 [2.34-3.32] | 18.48 [15.32-21.79] | 10.74 [7.63-14.28] | 21.1 [15.05-28] | 0.24 [0.1 to 0.38] |
| Viet Nam | 24.99 [13.35-50.68] | 38.42 [20.42-78.56] | 36.21 [18.25-73.08] | 23.27 [11.58-48.09] | -1.49 [-1.55 to -1.42] |
| Yemen | 2.36 [0.87-4.82] | 34.21 [12.45-72.03] | 4.81 [1.98-9.84] | 24.99 [10.25-51.76] | -1.38 [-1.57 to -1.19] |
| Zambia | 0.82 [0.29-1.92] | 20.34 [7.04-48.8] | 1.49 [0.63-3.29] | 15.56 [6.54-34.48] | -1.21 [-1.4 to -1.01] |
| Zimbabwe | 1.07 [0.63-1.82] | 18.32 [10.86-31.16] | 2.44 [1.39-4.16] | 25.28 [14.51-43] | 1.83 [1.29 to 2.38] |

**eTable 3. DALYs of SAH aged 55 and older between 1990 and 2021 at the global, regional levels the and national level**

|  | 1990 |  | 2021 |  | **1990-2021** |
| --- | --- | --- | --- | --- | --- |
|  | DALY cases No. *102 (95% UI) | Age-standardized DALY rate per 100,000 No. (95% UI) | DALY cases No. *102 (95% UI) | Age-standardized DALY rate per 100,000 No.(95% UI) | EAPC of Age-standardized DALY rate No. (95% CI) |
| Overall | 61471.9 [43463.37-77369.29] | 927.43 [654.08-1168.25] | 60081.48 [52177.27-68601.54] | 404.32 [351.13-461.66] | -3.12 [-3.37 to -2.87] |
| Sex |  |  |  |  |  |
| Female | 32583.91 [22687.36-40500.03] | 904.62 [630.86-1123.99] | 31543.88 [27530.71-36389.88] | 395.07 [345.68-455.63] | -3.13 [-3.38 to -2.88] |
| Male | 28887.98 [14555.42-39981.76] | 953 [475.33-1323.01] | 28537.6 [22418.15-35733.89] | 414.51 [325.84-518.14] | -3.11 [-3.36 to -2.87] |
| Socio-demographic index |  |  |  |  |  |
| High SDI | 9508.28 [8824.61-10114.7] | 506.9 [471.34-538.66] | 10925.51 [9767.22-11846.88] | 295.95 [268.31-319.25] | -1.89 [-2.01 to -1.77] |
| High-middle SDI | 14624.02 [10788.07-18063.15] | 867.35 [638.41-1072.91] | 11577.44 [10127.89-13760.04] | 331.79 [290.33-394.27] | -3.61 [-3.85 to -3.38] |
| Middle SDI | 28399.05 [15189.07-36591.88] | 1735.71 [914.1-2243.51] | 22699.52 [18482.32-26640.09] | 496.48 [402.65-583.78] | -4.75 [-5.25 to -4.26] |
| Low-middle SDI | 6921.31 [4478.15-10486.25] | 688.52 [442.14-1055.19] | 11644.87 [9074.88-15093.68] | 485.06 [377.06-631.31] | -1.17 [-1.22 to -1.13] |
| Low SDI | 1978.69 [995.41-3503.54] | 530.39 [264.84-947.68] | 3184.93 [1833.86-5989.19] | 390.44 [224.74-734.47] | -1.07 [-1.13 to -1] |
| Region |  |  |  |  |  |
| Andean Latin America | 239.55 [186.05-317.25] | 714.7 [554.6-949.26] | 560.81 [443.64-700.6] | 567.21 [448.64-708.26] | -0.86 [-1.04 to -0.69] |
| Australasia | 170.53 [151.14-191.05] | 429.13 [380.27-481.04] | 220.93 [190.47-251.01] | 233.1 [202.36-264.41] | -2.02 [-2.13 to -1.92] |
| Caribbean | 231.21 [185.57-298.22] | 538.54 [432.05-694.46] | 388.66 [300.41-496.79] | 420.21 [324.39-537.62] | -0.81 [-0.9 to -0.72] |
| Central Asia | 351.73 [312.71-400.02] | 446.55 [396.61-508.83] | 711.39 [630.36-799.8] | 516.58 [458.51-579.55] | 0.56 [0.37 to 0.76] |
| Central Europe | 1268.03 [1173.72-1368.09] | 477.89 [441.93-516.09] | 1204.02 [1088.3-1313.74] | 320.04 [289.44-349.35] | -1.48 [-1.76 to -1.2] |
| Central Latin America | 540.91 [501.49-581.08] | 400.82 [371.24-430.92] | 1943 [1718.69-2186.44] | 456.11 [403.71-513.01] | 0.49 [0.31 to 0.68] |
| Central Sub-Saharan Africa | 140.19 [65.74-304.91] | 381.6 [177.33-844.4] | 300.06 [133.78-790.8] | 343.84 [153.73-902.03] | -0.39 [-0.47 to -0.31] |
| East Asia | 33198.91 [16082.92-43846.95] | 2455.2 [1172.02-3250.82] | 16935.24 [12466.97-21411.69] | 444.14 [326.22-561.72] | -6.48 [-7.14 to -5.8] |
| Eastern Europe | 2408.26 [2220.18-2617.18] | 502.22 [461.71-546.49] | 3010.66 [2726.63-3287.55] | 482.36 [437.03-527.03] | -0.81 [-1.74 to 0.12] |
| Eastern Sub-Saharan Africa | 565.06 [224.77-1419.12] | 469.07 [185.76-1188.32] | 829.41 [367.59-2162.92] | 311.21 [138.49-809.49] | -1.47 [-1.52 to -1.42] |
| High-income Asia Pacific | 3204.02 [2903.27-3551.11] | 918.51 [831.1-1018.91] | 3505.64 [3006.57-3961.93] | 441.01 [386.9-494.37] | -2.58 [-2.66 to -2.49] |
| High-income North America | 2036.54 [1900.79-2161.65] | 354.55 [332.4-375.49] | 3504.98 [3184.04-3755.19] | 302.43 [277.17-323.02] | -0.56 [-0.7 to -0.42] |
| North Africa and Middle East | 1483.01 [934.52-2505.75] | 550.78 [342.52-944.07] | 1901.82 [1474.28-2474.86] | 264.73 [204.88-345.2] | -2.51 [-2.63 to -2.39] |
| Oceania | 48.85 [31.99-71.93] | 1078.84 [707.07-1593.58] | 88.71 [59.18-131.38] | 757.15 [506.57-1119.9] | -1.2 [-1.26 to -1.14] |
| South Asia | 6392.25 [3732.76-10677.57] | 668.82 [385.85-1135.25] | 11308.64 [8160.78-15652.23] | 454.3 [326.11-631.57] | -1.32 [-1.39 to -1.25] |
| Southeast Asia | 3576.2 [2714.56-5167.61] | 875.79 [660.76-1283.91] | 6228.68 [5064.74-8664.79] | 565.88 [457.02-797.8] | -1.5 [-1.58 to -1.43] |
| Southern Latin America | 710.92 [620.49-809.79] | 899.55 [784.96-1024.64] | 607.84 [539.03-680.81] | 408.8 [363.05-457.71] | -2.47 [-2.69 to -2.25] |
| Southern Sub-Saharan Africa | 81.88 [64.63-113.68] | 188.99 [149.31-261.62] | 201.08 [164.79-256.63] | 211.58 [173.57-269] | 0.56 [0.19 to 0.92] |
| Tropical Latin America | 907.29 [853.74-962.69] | 585.92 [549.88-622.71] | 2192.14 [2022.43-2338.42] | 494.73 [456.47-527.71] | -0.54 [-0.78 to -0.29] |
| Western Europe | 3453 [3199.33-3682.81] | 349.39 [324.76-372.2] | 3708.76 [3293.76-4028.07] | 223.96 [202.23-242.04] | -1.34 [-1.5 to -1.17] |
| Western Sub-Saharan Africa | 463.53 [234.95-1014.62] | 322.96 [164.55-702.52] | 728.98 [407.23-1568.22] | 229.46 [129.71-490.42] | -1.27 [-1.37 to -1.18] |
| National |  |  |  |  |  |
| Afghanistan | 108.86 [36.55-230] | 934.55 [306.68-2022.67] | 72.88 [32.73-137.56] | 600.64 [267.21-1144.34] | -1.74 [-2.01 to -1.47] |
| Albania | 12.12 [8.6-18.53] | 364.96 [259.32-549.97] | 17.77 [11.35-25.93] | 225.23 [143.65-328.91] | -1.4 [-1.62 to -1.18] |
| Algeria | 70.25 [35.86-137.93] | 378.98 [195.51-730.89] | 126.19 [76.31-205.71] | 226.72 [135.05-370.66] | -1.59 [-1.65 to -1.53] |
| American Samoa | 0.2 [0.14-0.28] | 596.38 [422.01-838.09] | 0.41 [0.29-0.57] | 508.38 [360.27-716] | -0.57 [-0.68 to -0.47] |
| Andorra | 0.31 [0.19-0.48] | 314.16 [193.17-492.13] | 0.51 [0.33-0.73] | 185.2 [120.94-267.73] | -1.48 [-1.64 to -1.32] |
| Angola | 24.66 [11.42-52.83] | 403.4 [186.16-872.73] | 55.62 [28.91-104.18] | 296.85 [155.33-556.05] | -1.29 [-1.39 to -1.18] |
| Antigua and Barbuda | 0.54 [0.46-0.63] | 612.81 [524.55-714.55] | 0.74 [0.63-0.86] | 399.7 [341.45-466.27] | -1.51 [-1.75 to -1.27] |
| Argentina | 565.29 [478.68-659.27] | 1018.46 [862.26-1187.76] | 382.48 [326.71-444.65] | 407.14 [347.91-473.37] | -2.92 [-3.27 to -2.57] |
| Armenia | 21.55 [18.66-24.19] | 467.85 [404.61-528.25] | 18.07 [15.84-20.47] | 231.86 [203.33-262.57] | -2.3 [-2.79 to -1.8] |
| Australia | 136.24 [118.11-155.63] | 411.02 [356.26-469.57] | 179.84 [152.54-207.5] | 223.61 [190.79-257.92] | -1.95 [-2.06 to -1.84] |
| Austria | 73.96 [63.82-84.06] | 363.06 [313.61-412.79] | 85.83 [71.91-100] | 261.68 [219.81-305.13] | -0.94 [-1.06 to -0.82] |
| Azerbaijan | 15.81 [11.16-21.99] | 180.06 [127.26-252.54] | 24.42 [17.31-33.6] | 134.12 [94.82-184.42] | -1.15 [-1.49 to -0.8] |
| Bahamas | 0.94 [0.78-1.14] | 382.06 [316.98-465.44] | 2.11 [1.66-2.66] | 293.7 [232.89-368.77] | -0.98 [-1.1 to -0.85] |
| Bahrain | 1.11 [0.79-1.57] | 457.24 [322.28-650.86] | 2.28 [1.61-3.19] | 184.23 [127.59-256.2] | -3.81 [-4.11 to -3.52] |
| Bangladesh | 907.35 [427.25-1777.48] | 1210.17 [565.73-2389.39] | 1619.99 [895.05-2875.98] | 704.13 [388.88-1251.31] | -1.63 [-1.9 to -1.36] |
| Barbados | 2.53 [2.14-2.93] | 531.73 [450.77-618.13] | 4.06 [3.14-5.1] | 442.77 [342.01-557.48] | -0.52 [-0.73 to -0.31] |
| Belarus | 86.7 [65.95-110.12] | 375.58 [285.17-477.32] | 100.25 [79.9-122.53] | 347.51 [276.72-425.34] | -0.68 [-0.91 to -0.45] |
| Belgium | 65.1 [56.53-74.58] | 243.64 [211.91-278.95] | 90.83 [76.26-104.71] | 220.18 [187.51-252.64] | -0.13 [-0.46 to 0.2] |
| Belize | 0.53 [0.44-0.63] | 345.89 [287.73-409.87] | 1.3 [1.08-1.56] | 260.21 [215.47-310.93] | -1.23 [-1.5 to -0.97] |
| Benin | 11.78 [5.3-26.14] | 369.18 [166.07-819.28] | 22.41 [10.44-50.69] | 274.8 [129.44-618.35] | -0.93 [-1.02 to -0.84] |
| Bermuda | 0.45 [0.37-0.54] | 424.25 [349.2-510.86] | 0.56 [0.45-0.69] | 233.94 [189.82-289.25] | -2.26 [-2.44 to -2.08] |
| Bhutan | 2.67 [1.29-4.93] | 668.39 [321.1-1246.59] | 3.82 [2.29-6.19] | 384.87 [230.52-622.77] | -1.85 [-1.92 to -1.78] |
| Bolivia (Plurinational State of) | 74.37 [47.77-116.05] | 1416.33 [905.88-2224.15] | 142.06 [91.13-215.38] | 926.08 [593.63-1405.04] | -1.39 [-1.45 to -1.34] |
| Bosnia and Herzegovina | 52.78 [35.07-77.53] | 720.32 [472.94-1077.05] | 35.19 [24.17-48.39] | 319.29 [219.27-439.15] | -3.09 [-3.34 to -2.84] |
| Botswana | 2.48 [1.51-4.16] | 279.51 [171.61-468.96] | 3.62 [2.38-5.74] | 158.36 [104.89-249.12] | -1.79 [-1.95 to -1.62] |
| Brazil | 885.02 [831.82-940.62] | 584.92 [548.32-622.64] | 2139.3 [1974.87-2282.89] | 493.88 [455.97-526.99] | -0.55 [-0.8 to -0.3] |
| Brunei Darussalam | 2.17 [1.5-3.04] | 1399.54 [966.35-1972.13] | 4 [2.92-5.26] | 696.07 [506.33-920.79] | -2.44 [-2.61 to -2.27] |
| Bulgaria | 80.49 [69.79-92.43] | 362.8 [314.38-416.76] | 113.1 [96.15-132.06] | 468.65 [396.43-549.33] | 0.82 [0.64 to 1] |
| Burkina Faso | 19.13 [6.76-51.93] | 267.81 [94.91-725.67] | 34.37 [13.69-83.72] | 231.14 [92.98-561.47] | -0.23 [-0.31 to -0.15] |
| Burundi | 24.46 [8.4-60.24] | 648.56 [221.55-1606.5] | 30.94 [8.67-105.09] | 395.82 [111.63-1350.74] | -1.95 [-2.17 to -1.74] |
| Cabo Verde | 0.82 [0.37-2.15] | 205.98 [92.82-545.1] | 1.35 [0.73-2.86] | 177.05 [97.05-369.25] | -0.68 [-0.86 to -0.5] |
| Cambodia | 68.26 [40.94-112.2] | 952.29 [565.36-1603] | 118.95 [76.23-192.73] | 580.58 [368.93-970.71] | -1.77 [-1.88 to -1.66] |
| Cameroon | 23.46 [11.44-45.18] | 322.13 [157.3-622.44] | 56.13 [25.69-119.22] | 277.83 [128.88-587.09] | -0.53 [-0.72 to -0.33] |
| Canada | 216.02 [187.97-246.14] | 393.98 [342.88-448.8] | 302.38 [255.92-349.69] | 233.12 [198.14-269.51] | -1.8 [-1.93 to -1.68] |
| Central African Republic | 9.84 [4.02-21.69] | 522.86 [212.03-1163.1] | 16.38 [5.7-39.31] | 465.07 [163.64-1127.62] | -0.4 [-0.44 to -0.37] |
| Chad | 15.81 [6.04-41.95] | 340.68 [130.1-902.46] | 32.12 [12.84-76] | 345.65 [139.33-817.08] | -0.03 [-0.21 to 0.15] |
| Chile | 81.35 [71.12-93.21] | 482.76 [422.01-553.12] | 166.17 [144.04-190.85] | 368.29 [319.77-422.68] | -0.57 [-0.9 to -0.23] |
| China | 32800.21 [15722.11-43427.94] | 2523.11 [1191.25-3348.92] | 16334.35 [11829.41-20805.15] | 444.13 [321-565.82] | -6.58 [-7.26 to -5.9] |
| Colombia | 182.87 [161.3-206.74] | 637.38 [562-720.27] | 580.25 [472.5-697] | 607.86 [495.56-730.06] | -0.09 [-0.44 to 0.25] |
| Comoros | 1.38 [0.64-2.79] | 429.82 [198.61-869.01] | 2.27 [1.02-5.14] | 284.84 [128.07-646.72] | -1.54 [-1.73 to -1.34] |
| Congo | 7 [3.8-13.57] | 397.17 [214.33-772.04] | 12.13 [6.55-23.31] | 285.04 [155.12-547.36] | -1.34 [-1.46 to -1.22] |
| Cook Islands | 0.14 [0.09-0.2] | 666.89 [439.18-972.17] | 0.13 [0.08-0.18] | 267.86 [180.05-384.77] | -3.02 [-3.22 to -2.81] |
| Costa Rica | 10.52 [8.98-12.12] | 369.95 [315.83-425.89] | 33.39 [27.67-39.27] | 347.87 [288.62-409.1] | -0.24 [-0.43 to -0.04] |
| Croatia | 68.33 [60.16-77.35] | 617.62 [542.55-699.52] | 52.17 [43.9-60.8] | 336.24 [281.71-393.55] | -1.87 [-2.06 to -1.67] |
| Cuba | 64.4 [55.12-74.72] | 381.24 [326.18-442.37] | 97.05 [80.02-116.11] | 282.4 [232.78-338.11] | -1.18 [-1.4 to -0.96] |
| Cyprus | 9.24 [5.99-14.2] | 728.17 [466.01-1124.09] | 8.32 [5.91-11.48] | 240.16 [169.62-332.63] | -3.78 [-4 to -3.57] |
| Czechia | 131.34 [113.39-150.56] | 553.73 [477.87-633.89] | 82.66 [70.81-95.85] | 225.63 [192.75-262.7] | -2.91 [-3.16 to -2.66] |
| Côte d'Ivoire | 18.67 [8.94-39.16] | 291.49 [141.17-606.76] | 43.02 [20.83-89.47] | 241.16 [119.14-497.91] | -0.55 [-0.72 to -0.38] |
| Democratic People's Republic of Korea | 293.87 [183.25-437.17] | 1179.44 [732.93-1756.83] | 419.59 [236.72-773.3] | 757.07 [426.21-1396.28] | -1.53 [-1.6 to -1.47] |
| Democratic Republic of the Congo | 94.42 [40.4-221.69] | 368.23 [155.37-880.91] | 210.78 [79.69-635.82] | 362.04 [137.59-1085.83] | -0.03 [-0.13 to 0.07] |
| Denmark | 66.66 [56.63-77.16] | 512.16 [436.09-591.69] | 57.95 [48.69-67.67] | 277.51 [234.09-323.84] | -1.97 [-2.15 to -1.79] |
| Djibouti | 0.86 [0.38-2.05] | 408.13 [183.21-965.09] | 3.13 [1.39-6.84] | 308.34 [140.47-667.57] | -1.02 [-1.14 to -0.91] |
| Dominica | 0.59 [0.42-0.8] | 592.99 [427.13-810.24] | 0.64 [0.44-0.9] | 426.37 [294.93-599.82] | -1.03 [-1.19 to -0.86] |
| Dominican Republic | 26.13 [17.68-38.89] | 431.35 [291.47-642.97] | 61.62 [41.55-88.99] | 368.82 [248.57-532.41] | -0.15 [-0.31 to 0.01] |
| Ecuador | 45.01 [38.16-52.29] | 521.98 [442.17-606.86] | 202.15 [157.62-257.22] | 732.63 [571.2-932.22] | 1.18 [0.95 to 1.41] |
| Egypt | 250.74 [130.67-461.47] | 625.83 [315.18-1193.78] | 269.98 [162.34-430.6] | 277.92 [166.07-449.24] | -2.59 [-2.69 to -2.5] |
| El Salvador | 24.04 [17.23-35.62] | 492.12 [352.7-729.45] | 32.9 [22.99-46.32] | 319.56 [223.1-451.03] | -1.3 [-1.65 to -0.95] |
| Equatorial Guinea | 1.44 [0.62-3.12] | 453.49 [195.64-989.54] | 1.36 [0.73-2.31] | 176.09 [95.92-297.9] | -3.74 [-4.25 to -3.23] |
| Eritrea | 10.84 [3.92-25.74] | 601.46 [219.71-1424.83] | 16.93 [6.96-36.96] | 392.18 [162.96-857.21] | -1.37 [-1.51 to -1.23] |
| Estonia | 12.18 [10.28-14.32] | 341.46 [288.4-401.45] | 11.13 [9.16-13.18] | 238.44 [196.44-282.68] | -1.84 [-2.47 to -1.2] |
| Eswatini | 1.24 [0.77-2.06] | 283.99 [177.53-468.43] | 2.11 [1.28-3.41] | 241.65 [148.68-386.23] | -0.18 [-0.58 to 0.22] |
| Ethiopia | 161.21 [52.93-413.4] | 505.35 [164.76-1313.83] | 159.37 [64.8-446.24] | 236.89 [96.36-663.5] | -2.84 [-2.98 to -2.69] |
| Fiji | 4.68 [3.4-6.34] | 876.64 [632.9-1197.73] | 8.38 [5.79-11.72] | 673.4 [461-946.43] | -1.06 [-1.19 to -0.93] |
| Finland | 73.78 [62.86-85.45] | 619.41 [529.18-717.16] | 78.33 [66.44-89.68] | 362.11 [308.61-413.55] | -1.81 [-1.9 to -1.71] |
| France | 377.86 [325.78-432.02] | 259.42 [223.7-296.52] | 504.68 [423.86-586.4] | 203.58 [172.54-236.42] | -0.47 [-0.8 to -0.13] |
| Gabon | 2.84 [1.6-5.23] | 293.84 [165.51-543.1] | 3.8 [2.24-6.53] | 218.88 [130.73-371.96] | -1 [-1.11 to -0.89] |
| Gambia | 1.65 [0.77-3.66] | 299.11 [140.23-658.01] | 4.66 [2.11-10.8] | 301.62 [137.59-696.99] | -0.08 [-0.22 to 0.07] |
| Georgia | 63.71 [52.23-77.27] | 585.14 [478.91-710] | 90.19 [74.48-106.54] | 844.94 [698.07-998.1] | 2.55 [1.59 to 3.52] |
| Germany | 754.48 [629.65-890.81] | 349.44 [291.89-411.77] | 750.33 [631.71-867.47] | 222.69 [189.25-257.18] | -1.58 [-1.78 to -1.38] |
| Ghana | 37.47 [17.95-84.81] | 364.37 [176.49-817.41] | 84.23 [45.61-162.63] | 309.39 [169.39-590.7] | -0.21 [-0.45 to 0.03] |
| Greece | 87 [67.56-105.42] | 323.51 [251.86-391.4] | 117.59 [99.69-135.28] | 286.07 [244.74-328.61] | -0.45 [-0.7 to -0.21] |
| Greenland | 0.91 [0.63-1.22] | 1673.53 [1145.51-2257.34] | 0.89 [0.6-1.21] | 670.89 [448.96-927.01] | -3.16 [-3.29 to -3.03] |
| Grenada | 0.82 [0.65-1.01] | 691.36 [541.22-844.23] | 0.91 [0.76-1.08] | 456.39 [379.27-541.57] | -1.32 [-1.46 to -1.17] |
| Guam | 0.65 [0.48-0.86] | 564.95 [403.75-747.72] | 1.06 [0.81-1.35] | 280.32 [215.03-357.96] | -2.2 [-2.47 to -1.92] |
| Guatemala | 9.6 [7.93-11.48] | 173.36 [143.21-207.59] | 42.28 [34.28-51.06] | 232.79 [188.92-280.83] | 0.74 [0.51 to 0.98] |
| Guinea | 17.89 [8.21-38.92] | 324.27 [148.66-706.5] | 27.79 [12.62-61.4] | 305.24 [139.23-676.44] | 0.04 [-0.08 to 0.17] |
| Guinea-Bissau | 3.24 [1.31-7.19] | 499.59 [202.67-1108.83] | 4.83 [2.07-11.11] | 415.82 [179.8-951.37] | -0.43 [-0.51 to -0.34] |
| Guyana | 4.33 [3.68-5.09] | 697.35 [592.78-820.63] | 5.58 [4.19-7.27] | 490.58 [369.68-635.8] | -0.97 [-1.17 to -0.78] |
| Haiti | 75.16 [37.34-131.66] | 1384.78 [684.34-2473.25] | 129.38 [59.16-226.85] | 1096.41 [500.27-1939.35] | -0.63 [-0.69 to -0.57] |
| Honduras | 23.91 [13.36-40.27] | 718.26 [401.2-1214.52] | 120.15 [77.02-175.06] | 1151.19 [737.38-1677.52] | 1.84 [1.63 to 2.05] |
| Hungary | 81.91 [73.54-90.86] | 321.28 [288.32-356.32] | 67.88 [57.47-78.8] | 215.89 [182.65-251.07] | -1.21 [-1.47 to -0.94] |
| Iceland | 1.83 [1.56-2.11] | 373.82 [319.33-430.96] | 2.16 [1.78-2.54] | 203.75 [169.11-239.01] | -1.79 [-2.07 to -1.52] |
| India | 4795.75 [2808.6-7924.67] | 612.86 [354.57-1029.47] | 8453.6 [6107.83-11619.6] | 417.47 [300.34-576.18] | -1.32 [-1.44 to -1.21] |
| Indonesia | 1276.98 [913.21-2000.92] | 809.06 [570.29-1311.13] | 2456.87 [1779.68-3805.59] | 616.86 [439.53-998.75] | -0.83 [-0.94 to -0.72] |
| Iran (Islamic Republic of) | 138.88 [90.9-209.12] | 339.75 [212.31-519.08] | 172.21 [131.25-211.61] | 138.75 [105-170.56] | -3.06 [-3.21 to -2.91] |
| Iraq | 48.61 [31.68-78.64] | 386.23 [251.47-626.92] | 83.28 [53.59-119.59] | 222.94 [143.54-319.23] | -2.45 [-2.68 to -2.22] |
| Ireland | 42.18 [36.96-47.53] | 614 [537.57-692.76] | 36.44 [30.5-42.36] | 259.67 [218.24-301.63] | -2.57 [-2.74 to -2.4] |
| Israel | 15.26 [13.02-17.86] | 187.35 [159.78-219.37] | 31.4 [26.09-36.84] | 146.16 [122.06-171.37] | -0.85 [-1.1 to -0.6] |
| Italy | 392.9 [363.24-420.39] | 257.59 [238.5-275.34] | 469.58 [406.86-517.53] | 176.45 [156.68-193.08] | -0.87 [-1.13 to -0.62] |
| Jamaica | 16.55 [13.57-19.95] | 569.36 [466.83-686.13] | 24.25 [18.5-30.83] | 457.2 [348.62-581.92] | -0.4 [-0.72 to -0.07] |
| Japan | 2493.99 [2311.93-2664.59] | 840.76 [778.79-898.63] | 2883.96 [2467.39-3262.41] | 483.95 [426.8-540.75] | -2.07 [-2.19 to -1.96] |
| Jordan | 2.19 [1.5-3.35] | 106.22 [72.41-164.14] | 7.36 [5.38-9.77] | 62.44 [45.39-82.99] | -1.9 [-2.08 to -1.72] |
| Kazakhstan | 120.77 [96.69-153.77] | 585.52 [467.07-747.34] | 189.74 [161.46-220.87] | 627.67 [536.18-728.14] | 0.03 [-0.21 to 0.27] |
| Kenya | 31.89 [15.07-76.53] | 246.03 [116.22-592.8] | 82.28 [42.5-181.23] | 227.61 [118.32-499.37] | 0 [-0.16 to 0.17] |
| Kiribati | 0.45 [0.3-0.71] | 776.02 [506.13-1208.05] | 0.87 [0.57-1.36] | 720.11 [473.09-1116.13] | -0.24 [-0.28 to -0.2] |
| Kuwait | 1.56 [1.3-1.87] | 178.54 [147.66-213.61] | 2.84 [2.22-3.58] | 66.26 [51.86-82.98] | -3.48 [-4.14 to -2.82] |
| Kyrgyzstan | 31.24 [26.32-37.34] | 607.98 [512.9-725.36] | 49.42 [40.08-59.27] | 592.33 [481.7-709.54] | -0.04 [-0.46 to 0.38] |
| Lao People's Democratic Republic | 40.63 [22.4-68.52] | 1191.65 [649.69-2056.47] | 40.1 [25.87-62.62] | 533.13 [340.42-853.63] | -2.79 [-2.87 to -2.71] |
| Latvia | 27.02 [23.26-31.32] | 435.4 [374.18-505.21] | 20.95 [17.54-24.68] | 305.54 [254.8-361.23] | -1.72 [-2.2 to -1.24] |
| Lebanon | 26.02 [15.91-42.75] | 721.32 [440.14-1189.1] | 20.06 [13.92-28.17] | 190.04 [132.38-266.39] | -4.78 [-5.08 to -4.48] |
| Lesotho | 4.01 [1.93-7.55] | 290.74 [140.27-545.54] | 6.39 [3.65-11.08] | 360.78 [206.77-624.45] | 1.35 [0.99 to 1.72] |
| Liberia | 5.78 [2.65-12.99] | 308.52 [140.89-694.14] | 9.53 [3.54-27.53] | 288.76 [109.03-833.37] | -0.48 [-0.66 to -0.31] |
| Libya | 6.57 [3.87-11.61] | 218.02 [128-389.42] | 14.84 [8.52-24.62] | 186.23 [107.75-308.94] | -0.48 [-0.69 to -0.26] |
| Lithuania | 23.58 [19.77-27.81] | 297.55 [249.19-351.43] | 28.63 [23.65-33.96] | 283.72 [233.35-337.33] | -0.44 [-1.08 to 0.19] |
| Luxembourg | 2.86 [2.46-3.3] | 303.86 [261.24-351.9] | 3.03 [2.54-3.58] | 160.42 [134.61-189.33] | -2.04 [-2.33 to -1.74] |
| Madagascar | 54.47 [20.64-133.45] | 649.87 [245.55-1602.11] | 95.49 [36.96-251.25] | 524.34 [204.7-1382.98] | -0.66 [-0.71 to -0.61] |
| Malawi | 24.93 [9.48-63.54] | 401.26 [152.47-1026.63] | 41.93 [15.26-120.12] | 360.85 [132.7-1028.78] | -0.55 [-0.72 to -0.38] |
| Malaysia | 91.59 [66.13-127.58] | 635.09 [456.84-887.3] | 171.56 [120.74-231.85] | 361.92 [253.77-491.89] | -1.79 [-1.87 to -1.7] |
| Maldives | 1.15 [0.78-1.76] | 803.21 [534.55-1244.53] | 1.36 [0.96-1.86] | 267.04 [190.06-365.14] | -3.88 [-4.04 to -3.73] |
| Mali | 21.27 [9.2-46.98] | 321.61 [138.57-712.53] | 35.47 [16.76-75.3] | 247.99 [117.63-525] | -0.7 [-0.82 to -0.59] |
| Malta | 1.6 [1.36-1.87] | 220.64 [186.62-257.17] | 2.16 [1.78-2.57] | 128.27 [106-152.59] | -1.64 [-1.87 to -1.41] |
| Marshall Islands | 0.33 [0.2-0.53] | 1347.29 [797.84-2207.47] | 0.54 [0.32-0.85] | 969.44 [579.51-1539.23] | -1.14 [-1.19 to -1.08] |
| Mauritania | 5.75 [2.79-11.87] | 344.83 [167.36-711.38] | 8.49 [4.03-18.38] | 238.25 [114.08-513.69] | -1.25 [-1.36 to -1.14] |
| Mauritius | 9.71 [8.42-11.08] | 807.19 [699.33-922.59] | 16.94 [14.59-19.53] | 512.13 [440.83-590.71] | -2.03 [-2.43 to -1.61] |
| Mexico | 193.76 [182.64-206.22] | 281.96 [265.41-300.34] | 811.55 [717.23-914.74] | 379.23 [335.37-427.16] | 1.12 [0.91 to 1.33] |
| Micronesia (Federated States of) | 1.06 [0.64-1.69] | 1377.01 [821.7-2211.83] | 1.16 [0.71-1.82] | 939.97 [567.56-1473.85] | -1.3 [-1.43 to -1.17] |
| Monaco | 0.47 [0.31-0.72] | 404.88 [266.59-606.74] | 0.29 [0.19-0.41] | 171.06 [115.25-243.61] | -2.81 [-2.95 to -2.67] |
| Mongolia | 20.4 [12.54-34.03] | 1208 [741.4-2024.09] | 41.7 [29.14-57.1] | 1155.34 [799.09-1582.78] | -0.13 [-0.38 to 0.11] |
| Montenegro | 2.39 [1.78-3.16] | 221.29 [164.61-291.59] | 3.54 [2.41-4.93] | 206.19 [139.35-288.08] | -0.44 [-0.73 to -0.15] |
| Morocco | 106.28 [43.72-230.55] | 461.13 [188.57-1006.34] | 190.18 [106.2-313.2] | 328.83 [183.94-543.09] | -0.94 [-1 to -0.88] |
| Mozambique | 54.27 [17.48-164.78] | 553.9 [178.8-1683.52] | 102.93 [36.13-296.5] | 565.79 [200.11-1617.91] | 0.44 [0.28 to 0.6] |
| Myanmar | 428.21 [254.9-715.33] | 1100.18 [645.55-1877.16] | 452.26 [294.07-722.7] | 546.6 [352.69-888.76] | -2.66 [-2.82 to -2.5] |
| Namibia | 2.88 [1.81-4.73] | 275.9 [173.26-450.76] | 4.74 [3.02-7.62] | 217.99 [139.64-348.4] | -0.97 [-1.2 to -0.75] |
| Nauru | 0.08 [0.05-0.13] | 1124.35 [667.93-1862.01] | 0.09 [0.05-0.13] | 975.81 [590.84-1500.34] | -0.55 [-0.96 to -0.15] |
| Nepal | 117.31 [57.13-235.41] | 756.1 [364.21-1552.2] | 186.07 [102.76-321.7] | 471.39 [259.06-818.15] | -1.48 [-1.74 to -1.21] |
| Netherlands | 136.51 [118.2-156.39] | 406.55 [352.26-465.66] | 142.73 [121.14-164.4] | 228.12 [194.45-262.36] | -2.06 [-2.29 to -1.84] |
| New Zealand | 34.29 [29.99-38.72] | 519.87 [455.14-586.89] | 41.09 [35.36-47.24] | 280.32 [242.37-321.41] | -2.3 [-2.54 to -2.07] |
| Nicaragua | 9.46 [6.94-12.91] | 381.59 [280.13-521.65] | 23.35 [16.46-31.57] | 288.6 [203.66-390.1] | -0.63 [-0.81 to -0.45] |
| Niger | 15.87 [5.96-37.69] | 365.97 [138.54-866.11] | 41.89 [16.21-102.76] | 309.01 [119.82-756.94] | -0.47 [-0.51 to -0.42] |
| Nigeria | 231.61 [111.94-525.48] | 320.03 [156.24-718.82] | 249.75 [140.57-522.63] | 170.11 [97.15-353.01] | -2.61 [-2.85 to -2.37] |
| Niue | 0.03 [0.02-0.05] | 896.93 [582.56-1310.78] | 0.02 [0.01-0.03] | 551.63 [374.74-790.32] | -1.81 [-1.93 to -1.69] |
| North Macedonia | 28.17 [20.85-38.85] | 864.47 [639-1198.19] | 40.68 [29.32-54.84] | 717.97 [515.26-971.35] | -0.7 [-1.02 to -0.37] |
| Northern Mariana Islands | 0.19 [0.13-0.27] | 874.38 [607.4-1264.8] | 0.54 [0.38-0.73] | 621.89 [439.32-852.06] | -1.12 [-1.22 to -1.02] |
| Norway | 58.1 [53.25-62.59] | 512.23 [471.93-550.69] | 40.79 [35.87-45.23] | 227.5 [202-251.84] | -2.52 [-2.77 to -2.26] |
| Oman | 4.08 [2.4-6.67] | 412.26 [241.96-678.57] | 4.97 [3.18-7.15] | 178.23 [113.81-256.19] | -2.68 [-2.79 to -2.57] |
| Pakistan | 569.17 [333.09-994.65] | 624.84 [363.55-1099.75] | 1045.16 [670.38-1664.86] | 526.15 [337.55-844.05] | -0.92 [-1.17 to -0.66] |
| Palau | 0.11 [0.08-0.17] | 744.77 [489.98-1087.62] | 0.2 [0.14-0.28] | 517.84 [356.94-740.75] | -1.02 [-1.12 to -0.93] |
| Palestine | 2.54 [1.67-3.97] | 181.45 [119.23-284.7] | 4.25 [3.09-5.64] | 107.66 [77.83-143.65] | -1.69 [-1.94 to -1.43] |
| Panama | 11.87 [10.03-13.74] | 490.41 [414.24-568.1] | 36.63 [28.03-45.17] | 488.09 [373.48-602.23] | 0.01 [-0.21 to 0.23] |
| Papua New Guinea | 32.12 [18.71-51.45] | 1161.23 [674.38-1876.8] | 61.51 [36.67-98.52] | 797.02 [472.97-1278.41] | -1.25 [-1.3 to -1.2] |
| Paraguay | 22.26 [16.13-30.23] | 612.22 [443.5-831.94] | 52.84 [36.03-74.4] | 531.73 [362.58-748.24] | -0.07 [-0.24 to 0.11] |
| Peru | 120.17 [81.75-176.93] | 612.44 [416.73-901.84] | 216.61 [146.17-316.53] | 387.59 [261.64-566.37] | -1.79 [-2.14 to -1.44] |
| Philippines | 163.63 [132.59-234.66] | 354.68 [283.53-522.1] | 560.63 [457.38-709.04] | 407.42 [332.01-523.66] | 0.76 [0.6 to 0.93] |
| Poland | 323.16 [304.92-341.65] | 419.25 [395.52-443.23] | 294.23 [264.04-325.54] | 244.46 [219.82-270.34] | -1.95 [-2.32 to -1.57] |
| Portugal | 115.47 [101.14-130.48] | 477.34 [417.04-539.49] | 121.09 [101.83-140.01] | 277.47 [236.06-319.46] | -1.34 [-1.57 to -1.1] |
| Puerto Rico | 17.34 [14.91-20.05] | 284.97 [245.06-329.54] | 24.63 [19.91-29.89] | 200.73 [161.98-244.63] | -1.67 [-1.96 to -1.38] |
| Qatar | 1.13 [0.65-1.92] | 889.02 [515.47-1512.14] | 3.32 [2.1-5.04] | 305.8 [193.31-464.49] | -3.81 [-4.35 to -3.25] |
| Republic of Korea | 687.75 [490.28-985.34] | 1454.25 [1030.77-2108.88] | 588.03 [453.67-744.77] | 349.63 [269.84-442.85] | -4.56 [-4.77 to -4.34] |
| Republic of Moldova | 20.28 [17.05-23.99] | 270.61 [227.4-320.15] | 23.67 [19.93-27.96] | 224.43 [189-265.41] | -1.04 [-1.66 to -0.41] |
| Romania | 245.67 [200.01-296.93] | 499.01 [405.73-602.83] | 299.54 [245.12-354.81] | 479.36 [388.43-571.7] | -0.29 [-0.78 to 0.21] |
| Russian Federation | 1464.39 [1398.33-1534.48] | 470.56 [448.65-493.45] | 2232 [2029.58-2437.13] | 525.34 [478.03-573.37] | -0.51 [-1.74 to 0.74] |
| Rwanda | 31.29 [12.15-64.16] | 669.81 [258.16-1389.37] | 30.82 [12.83-72.28] | 300.62 [126.24-700.53] | -3.38 [-3.7 to -3.07] |
| Saint Kitts and Nevis | 0.45 [0.36-0.54] | 706.84 [565.65-848.79] | 0.52 [0.41-0.63] | 417.34 [336.3-506.01] | -1.83 [-2.06 to -1.6] |
| Saint Lucia | 0.91 [0.76-1.07] | 632.11 [528.44-746.12] | 1.44 [1.15-1.78] | 342.78 [272.93-424.16] | -2.53 [-2.79 to -2.26] |
| Saint Vincent and the Grenadines | 0.46 [0.38-0.54] | 380.55 [319.17-448.16] | 0.71 [0.59-0.86] | 283.07 [234.92-338.66] | -1.03 [-1.2 to -0.87] |
| Samoa | 1.32 [0.85-1.93] | 965.49 [620.06-1411.47] | 1.66 [1.08-2.42] | 695.98 [452.8-1021.75] | -1.13 [-1.31 to -0.95] |
| San Marino | 0.11 [0.08-0.16] | 187.76 [134.13-257.47] | 0.12 [0.08-0.17] | 91.24 [60.92-129.61] | -1.9 [-2.11 to -1.69] |
| Sao Tome and Principe | 0.28 [0.14-0.63] | 255.93 [124.12-565.5] | 0.46 [0.23-1.01] | 249.24 [124.83-546.51] | -0.23 [-0.39 to -0.06] |
| Saudi Arabia | 17.33 [10.92-29.44] | 199.8 [125.55-341.19] | 35.48 [23.29-51.8] | 124.09 [81.15-180.84] | -1.41 [-1.58 to -1.24] |
| Senegal | 16.59 [7.97-35.98] | 314.17 [151.19-681.41] | 35.53 [16.81-76.97] | 276.84 [132.05-598.77] | -0.31 [-0.4 to -0.22] |
| Serbia | 166.5 [117.51-230.82] | 833.77 [590.2-1156.88] | 132.94 [96.44-180.19] | 469.01 [340.22-634.5] | -2.47 [-2.8 to -2.14] |
| Seychelles | 0.39 [0.25-0.6] | 409.42 [261.93-625.96] | 0.41 [0.26-0.62] | 201.93 [127.61-310.61] | -1.83 [-2.01 to -1.65] |
| Sierra Leone | 10.08 [4.24-24.47] | 305.01 [128.4-741.53] | 17.3 [7.42-46.32] | 286.46 [123.58-767.36] | 0.03 [-0.15 to 0.21] |
| Singapore | 20.11 [17.55-22.87] | 554.29 [483.3-630.38] | 29.65 [24.69-35.07] | 196.84 [163.92-232.78] | -3.53 [-3.66 to -3.39] |
| Slovakia | 40.56 [30.67-52.13] | 390.36 [294.86-502.46] | 35.16 [25.66-47.08] | 214.32 [156.25-287.5] | -1.9 [-1.96 to -1.84] |
| Slovenia | 14.33 [12.2-16.6] | 331.8 [282.55-384.14] | 11.65 [9.41-13.96] | 148.6 [120.27-178.25] | -2.65 [-2.91 to -2.38] |
| Solomon Islands | 2.75 [1.56-4.54] | 1312.98 [744.19-2173.04] | 5.39 [3.34-8.45] | 1050.04 [644.89-1648.63] | -0.67 [-0.83 to -0.51] |
| Somalia | 23.56 [6.07-74.65] | 661.01 [168.68-2130.18] | 46.36 [10.58-160.85] | 495.82 [114.23-1740.21] | -0.9 [-0.97 to -0.84] |
| South Africa | 44.65 [36.37-56.49] | 134.82 [109.78-170.39] | 120.82 [98.64-142.98] | 157.6 [128.52-186.38] | 0.49 [0.13 to 0.85] |
| South Sudan | 17.21 [7.96-36.68] | 414.13 [191.61-881.99] | 20.29 [8.39-48.64] | 333.73 [138.2-809.04] | -0.95 [-1.28 to -0.62] |
| Spain | 216.47 [186.17-246.67] | 224.3 [192.69-255.7] | 389.05 [322.41-452.15] | 215.73 [180.76-250.26] | 0.1 [-0.23 to 0.44] |
| Sri Lanka | 64.23 [47.14-87.18] | 380.17 [278.36-516.09] | 108.23 [74.01-149.42] | 230.21 [156.86-318.57] | -1.36 [-1.51 to -1.21] |
| Sudan | 90.16 [32.35-182.3] | 618.05 [219.77-1262.32] | 96.44 [47.16-179.43] | 323.58 [158.03-606.22] | -2.3 [-2.39 to -2.21] |
| Suriname | 2.22 [1.59-3.02] | 513.2 [369-698.38] | 4.55 [3.09-6.44] | 407.01 [274.99-576.08] | -0.73 [-0.94 to -0.52] |
| Sweden | 106.52 [93.04-120.17] | 432.75 [378.97-487.38] | 75.74 [62.89-88.65] | 198.28 [165.58-232.19] | -2.36 [-2.62 to -2.09] |
| Switzerland | 53.65 [45.26-62.61] | 304.55 [257.79-354.49] | 56.23 [46.19-66.08] | 168.33 [139.63-197.69] | -1.73 [-1.88 to -1.58] |
| Syrian Arab Republic | 29.04 [17.58-56.28] | 345.39 [207.67-681.4] | 47.92 [30.55-72.17] | 218.8 [138.99-332.07] | -1.97 [-2.27 to -1.67] |
| Taiwan (Province of China) | 104.83 [92.06-118.93] | 388.07 [340.13-440.38] | 181.3 [151.84-212.12] | 239.34 [200.86-279.9] | -2.23 [-2.56 to -1.9] |
| Tajikistan | 19.73 [13.1-31.17] | 428.06 [283.07-684.74] | 35.19 [24.51-48.42] | 375.65 [260.1-517.6] | -0.81 [-1.36 to -0.25] |
| Thailand | 848.74 [569.23-1214.69] | 1537.13 [1024.72-2207.86] | 1416.29 [982.3-1987.07] | 730.05 [507.31-1023.62] | -2.86 [-3.06 to -2.66] |
| Timor-Leste | 3.29 [1.86-5.67] | 789.26 [440.26-1402.43] | 8.5 [4.62-15.54] | 608.2 [328.12-1125.86] | -0.73 [-0.89 to -0.56] |
| Togo | 6.36 [2.81-15.37] | 325.8 [144.86-784.31] | 19.64 [8.51-47.82] | 314.18 [138.27-754.69] | -0.03 [-0.15 to 0.09] |
| Tokelau | 0.03 [0.02-0.05] | 1214.4 [693.93-1992.66] | 0.02 [0.01-0.02] | 605.15 [395.18-911.96] | -2.36 [-2.41 to -2.32] |
| Tonga | 0.44 [0.29-0.68] | 484.08 [314.51-763.19] | 0.48 [0.31-0.73] | 355.94 [231.89-540.3] | -0.84 [-0.91 to -0.76] |
| Trinidad and Tobago | 8.29 [7.05-9.6] | 611.07 [519.32-708.76] | 14.69 [11.19-19.17] | 422.4 [322.23-550.94] | -1.45 [-1.62 to -1.27] |
| Tunisia | 29.41 [15.06-53.29] | 360.91 [183.51-659.44] | 46.92 [25.75-79.21] | 207.87 [113.72-351.05] | -1.9 [-1.95 to -1.86] |
| Turkmenistan | 17.57 [14.54-22.87] | 535.16 [441.7-697.46] | 57.56 [42.73-81.77] | 817.43 [609.37-1155.18] | 1.52 [1.17 to 1.87] |
| Tuvalu | 0.17 [0.1-0.27] | 1530.02 [853.93-2520.23] | 0.15 [0.09-0.23] | 844.81 [523.98-1311.98] | -1.86 [-1.99 to -1.74] |
| Uganda | 42.08 [14.42-113.33] | 408.85 [140.19-1104.18] | 58.63 [25-144.51] | 253.03 [109.42-614.74] | -2.05 [-2.22 to -1.87] |
| Ukraine | 774.13 [633.19-940.06] | 633.18 [516.51-769.42] | 594.03 [437.92-770.94] | 431.68 [317.67-561.57] | -1.49 [-1.64 to -1.34] |
| United Arab Emirates | 3.49 [1.98-6.25] | 668.82 [377.54-1257.09] | 13.96 [9.15-19.96] | 354.97 [223.37-518.5] | -0.66 [-1.14 to -0.18] |
| United Kingdom | 797.82 [757.57-834.8] | 538.37 [512.82-562.29] | 640.32 [580.86-686.64] | 278.8 [256.01-297.96] | -2.16 [-2.33 to -1.99] |
| United Republic of Tanzania | 64.97 [24.29-162.77] | 367.3 [136.64-930.79] | 97.34 [43.36-251.1] | 243.59 [108.44-630.01] | -1.5 [-1.57 to -1.43] |
| United States of America | 1819.56 [1695.09-1934.85] | 350.56 [328.21-371.86] | 3201.65 [2907.01-3433.38] | 310.84 [284.6-332.46] | -0.43 [-0.57 to -0.29] |
| United States Virgin Islands | 0.75 [0.51-1.09] | 546.62 [367.52-795.8] | 0.77 [0.53-1.1] | 240.81 [164.54-343.03] | -2.48 [-2.66 to -2.29] |
| Uruguay | 64.26 [55.43-73.89] | 962.38 [830.52-1106.75] | 59.16 [50.8-67.78] | 637.93 [550.74-730.22] | -1.55 [-1.68 to -1.41] |
| Uzbekistan | 40.94 [33.87-49.54] | 208.57 [172.32-252.79] | 205.09 [166.07-253.91] | 475.31 [386.83-585.03] | 2.17 [1.27 to 3.07] |
| Vanuatu | 0.98 [0.58-1.53] | 1036.13 [608.98-1615.27] | 2.14 [1.26-3.35] | 782.24 [458.51-1229.13] | -1.07 [-1.18 to -0.96] |
| Venezuela (Bolivarian Republic of) | 74.89 [63.82-86.99] | 478.82 [407.87-556.16] | 262.5 [191.6-342.44] | 504.96 [369.49-657.57] | -0.07 [-0.2 to 0.06] |
| Viet Nam | 574.2 [333.05-1096.42] | 841.24 [485.67-1615.46] | 867.9 [494.98-1554.69] | 517.42 [291.93-947.49] | -1.43 [-1.5 to -1.36] |
| Yemen | 57.26 [23.03-112.07] | 741.8 [294.16-1479.98] | 109.94 [48.6-215.62] | 516.29 [227.45-1022.22] | -1.54 [-1.73 to -1.35] |
| Zambia | 21.24 [9.02-46.41] | 475.8 [199.74-1051.32] | 39.99 [19.08-83.02] | 379.08 [182.17-785.01] | -1.08 [-1.26 to -0.9] |
| Zimbabwe | 26.62 [16.55-43.95] | 417.43 [260.3-686.04] | 63.39 [37.79-103.96] | 591.46 [355.01-968.49] | 1.83 [1.29 to 2.36] |
